# Supplementary material for: Protocol for an economic evaluation of WHO STOPS childhood obesity stepped-wedge cluster randomised controlled trial
Source: PubMed Central journal article supplement — BMJ Open. 2018 May 14;8(5):e020551. doi: 10.1136/bmjopen-2017-020551 (PMC5961569; doi:10.1136/bmjopen-2017-020551), 2018-05-14
Supplement: bmjopen-2017-020551.draft_revisions.pdf [file bmjopen-2017-020551.draft_revisions.pdf]

# BMJ Open

BMJ Open is committed to open peer review. As part of this commitment we make the peer review history of every article we publish publicly available.

When an article is published we post the peer reviewers' comments and the authors' responses online. We also post the versions of the paper that were used during peer review. These are the versions that the peer review comments apply to.

The versions of the paper that follow are the versions that were submitted during the peer review process. They are not the versions of record or the final published versions. They should not be cited or distributed as the published version of this manuscript.

BMJ Open is an open access journal and the full, final, typeset and author-corrected version of record of the manuscript is available on our site with no access controls, subscription charges or pay-per-view fees (<http://bmjopen.bmj.com>).

If you have any questions on BMJ Open's open peer review process please email [info.bmjopen@bmj.com](mailto:info.bmjopen@bmj.com)

# BMJ Open

## Economic evaluation of the WHO STOPS childhood obesity stepped wedge cluster randomised controlled trial

|                               |                                                                                                                                                                                                                                                                                                                                                                                                                                                                                                                                                                                                                                                                                                                                                                                                                                                                                                                                                                                                                                                                                                                                                                                                                                                                     |
|-------------------------------|---------------------------------------------------------------------------------------------------------------------------------------------------------------------------------------------------------------------------------------------------------------------------------------------------------------------------------------------------------------------------------------------------------------------------------------------------------------------------------------------------------------------------------------------------------------------------------------------------------------------------------------------------------------------------------------------------------------------------------------------------------------------------------------------------------------------------------------------------------------------------------------------------------------------------------------------------------------------------------------------------------------------------------------------------------------------------------------------------------------------------------------------------------------------------------------------------------------------------------------------------------------------|
| Journal:                      | <i>BMJ Open</i>                                                                                                                                                                                                                                                                                                                                                                                                                                                                                                                                                                                                                                                                                                                                                                                                                                                                                                                                                                                                                                                                                                                                                                                                                                                     |
| Manuscript ID                 | bmjopen-2017-020551                                                                                                                                                                                                                                                                                                                                                                                                                                                                                                                                                                                                                                                                                                                                                                                                                                                                                                                                                                                                                                                                                                                                                                                                                                                 |
| Article Type:                 | Protocol                                                                                                                                                                                                                                                                                                                                                                                                                                                                                                                                                                                                                                                                                                                                                                                                                                                                                                                                                                                                                                                                                                                                                                                                                                                            |
| Date Submitted by the Author: | 10-Nov-2017                                                                                                                                                                                                                                                                                                                                                                                                                                                                                                                                                                                                                                                                                                                                                                                                                                                                                                                                                                                                                                                                                                                                                                                                                                                         |
| Complete List of Authors:     | Sweeney, Rohan; Deakin University School of Health and Social Development, Deakin Health Economics<br>Moodie, Marj; Deakin University School of Health and Social Development, Deakin Health Economics<br>Nguyen, Phuong; Deakin University School of Health and Social Development, Deakin Health Economics<br>Fraser, Penny; Deakin University School of Health and Social Development, Global Obesity Centre<br>Bolton, Kristy; Deakin University School of Health and Social Development, Global Obesity Centre<br>Brown, Andrew; Deakin University School of Health and Social Development, Global Obesity Centre<br>Marks, Jennifer; Deakin University School of Health and Social Development, Global Obesity Centre<br>Crooks, Nic; Deakin University School of Health and Social Development, Global Obesity Centre<br>Strugnell, Claudia; Deakin University - Geelong Waterfront Campus, WHO Collaborating Centre for Obesity Prevention<br>Bell, Colin; Deakin University Faculty of Health,<br>Millar, Lynne; Victoria University College of Arts, Australian Health Policy Collaboration<br>Orellano, Liliana; Deakin University School of Health and Social Development, Biostatistics Unit<br>Allender, Steven; Deakin University, Faculty of Health |
| Keywords:                     | childhood obesity, Community child health < PAEDIATRICS, systems-based intervention, economic evaluation, cost effectiveness                                                                                                                                                                                                                                                                                                                                                                                                                                                                                                                                                                                                                                                                                                                                                                                                                                                                                                                                                                                                                                                                                                                                        |
|                               |                                                                                                                                                                                                                                                                                                                                                                                                                                                                                                                                                                                                                                                                                                                                                                                                                                                                                                                                                                                                                                                                                                                                                                                                                                                                     |

SCHOLARONE™  
Manuscripts

1  
2  
3 **Title: Economic evaluation of the WHO STOPS childhood obesity stepped**  
4 **wedge cluster randomised controlled trial**  
5  
6

7 Rohan Sweeney<sup>1,2‡</sup>, Marj Moodie<sup>1,2</sup>, Phuong Nguyen<sup>1,2</sup>, Penny Fraser<sup>2</sup>, Kristy Bolton<sup>2</sup>,  
8 Andrew Brown<sup>2</sup>, Jennifer Marks<sup>2</sup>, Nic Crooks<sup>2</sup>, Claudia Strugnell<sup>2</sup>, Colin Bell<sup>2</sup>, Lynne Millar<sup>4</sup>,  
9 Liliana Orellana<sup>3</sup>, Steven Allender<sup>2</sup>  
10  
11

12  
13  
14 <sup>1</sup> Deakin University, Geelong Australia. Deakin Health Economics, Centre for Population  
15 Health Research.

16 <sup>2</sup> Deakin University, Geelong Australia, Global Obesity Centre, Centre for Population Health  
17 Research.  
18

19 <sup>3</sup> Deakin University, Geelong Australia, Biostatistics Unit. Faculty of Health.  
20

21 <sup>4</sup> Victoria University, Melbourne Australia, Australian Health Policy Collaboration.  
22  
23

24 <sup>‡</sup> Corresponding author. Address: Deakin Health Economics, Deakin University. 221  
25 Burwood Highway, Burwood, VIC 3125.  
26

27 Email: rohan.sweeney@deakin.edu.au. Ph: +613 92468543.  
28  
29  
30  
31  
32  
33

34 **Keywords:** childhood obesity, community prevention, systems-based intervention,  
35 economic evaluation, cost effectiveness.  
36  
37  
38  
39  
40

41 **Declarations:**

42 This study is supported by a NHMRC Partnership Project titled "Whole of Systems Trial of  
43 Prevention Strategies for childhood obesity: WHO STOPS childhood obesity"  
44 (APP1114118). The work described herein has also received funding support from the  
45 Western Alliance. Study researchers (listed in Title Page) are researchers within the  
46 NHMRC Centre for Research Excellence in Obesity Policy and Food Systems  
47 (APP1041020). We would also like to acknowledge the support from the Victorian  
48 Department of Health and Human Services, Victorian Department of Education and Training,  
49 South West Primary Care Partnership (PCP), Southern Grampians Glenelg PCP, Portland  
50 District Health, Western District Health Service, Colac Area Health, Portland Hamilton  
51  
52  
53  
54  
55  
56  
57  
58  
59  
60

1  
2  
3 Principal Network of Schools (NoS), Colac Corangamite NoS, Warnambool and District NoS,  
4 Glenelg Shire Council, Southern Grampians Shire Council.  
5  
6

7 Full ethics clearances have been received for all methods described below: Deakin  
8 University's Human Research Ethics Committee (DU-HREC) 2014-279, Deakin University's  
9 Human Ethics Advisory Group-Health (HEAG-H) HEAG-H 194\_2014, HEAG-H 17 2015,  
10 HEAG-H 155\_2014, HEAG-H 197\_2016, HEAG-H 118\_2017), the Victorian Department of  
11 Education and Training 2015\_002622 and the Catholic Archdiocese of Ballarat.  
12  
13  
14  
15

16  
17  
18 **Contributorship Statement:**

19 Rohan Sweeney led the conceptual design and writing of this work. Marj Moodie made  
20 substantial contributions to the conceptual design of the work as well as substantial  
21 contributions to the writing of this work. Co-authors Phuong Nguyen, Penny Fraser, Kristy  
22 Bolton, Andrew Brown, Jennifer Marks, Nic Crooks, Claudia Strugnell, Colin Bell, Lynne  
23 Millar, Liliana Orellana, Steven Allender all made substantial contributions to the conceptual  
24 design of the methods described in this Economic Evaluation Protocol, and all made  
25 important contributions in revising the manuscript critically for important intellectual content.  
26 All authors have approved of the final version of the submitted manuscript.  
27  
28  
29  
30  
31  
32  
33  
34  
35  
36  
37  
38  
39  
40  
41  
42  
43  
44  
45  
46  
47  
48  
49  
50  
51  
52  
53  
54  
55  
56  
57  
58  
59  
60

## Abstract

### Introduction

Prevention of overweight and obesity in childhood is a priority because of associated acute and chronic conditions in childhood and later in life, which place significant burden on health systems. Evidence suggests prevention should engage a range of actions and actors and target multiple levels. The Whole of Systems Trial Of Prevention Strategies for childhood obesity (WHO STOPS) will evaluate the outcomes of a novel systems-based intervention that aims to engage whole communities in a locally led multifaceted response. This paper describes the planned economic evaluation of WHO STOPS and examines the methodological challenges for economic evaluation of a complex systems-based intervention.

### Methods and analysis

Economic evaluation alongside a stepped wedge cluster RCT in regional and rural communities in Victoria, Australia. Cost-effectiveness and cost-utility analyses will provide estimates of the incremental cost (in Australian dollars) per body mass index (BMI) unit saved and quality adjusted life year (QALY) gained. A Markov cohort model will be employed to estimate healthcare cost savings and benefits over the life course of children. The dollar value of community resources harnessed for the community-led response will be estimated. Probabilistic uncertainty analyses will be undertaken to test sensitivity of results to plausible variations in all trial-based and modelled variables. WHO STOPS will also be assessed against other implementation considerations (such as sustainability and acceptability to communities and other stakeholders).

### Ethics and dissemination

The trial is registered by the Australian New Zealand Clinical Trials Registry (ACTRN12616000980437). Full ethics clearances have been received for all methods described below: Deakin University's Human Research Ethics Committee (DU-HREC) 2014-279, Deakin University's Human Ethics Advisory Group-Health (HEAG-H) HEAG-H 194\_2014, HEAG-H 17 2015, HEAG-H 155\_2014, HEAG-H 197\_2016, HEAG-H 118\_2017), the Victorian Department of Education and Training 2015\_002622 and the Catholic Archdiocese of Ballarat.

### Strengths and limitations of this study

- This protocol describes the methods for assessing the cost-effectiveness of WHO STOPS, a systems-based childhood obesity prevention intervention, from the funder/organiser and societal perspectives.
- The WHO STOPS intervention effect on childhood BMI will be identified using a step-wedge, cluster-randomised controlled trial design.
- This is a novel and complex intervention that poses many challenges for economic evaluation, including defining boundaries around the intervention; identification and measurement of costs and appropriate attribution of costs to WHO STOPS.
- A range of data collection approaches will be employed to identify and measure the resources contributed across multiple sectors in participating communities.
- Given the nature of the intervention and its engagement complexity, this economic evaluation will employ and assess novel approaches for assessing costs and cost effectiveness.

## 1. Introduction

Childhood obesity causes a range of acute and chronic conditions reducing mental and physical health and wellbeing (Han, Lawlor & Kimm 2010; Pulgarón 2013; Williams et al. 2015). Obese children are at higher risk of becoming obese adults, a major risk factor for diabetes, cardiovascular disease and some cancers (Llewellyn et al. 2016; Singh et al. 2008; Williams et al. 2015). The World Health Organization (WHO) estimates that 23% of children living in developed countries are overweight or obese (Ng et al. 2014). In Australia, the most recent National Health Survey (2014-15) indicates that 27% of children aged 7-12 years are overweight or obese (Australian Bureau of Statistics 2016). It is estimated the direct costs of obesity to the health system were \$8.6 billion in the 2011/12 financial year (Duckett et al. 2016). Preventing the onset of overweight and obesity during childhood could improve physical and psychological wellbeing, and education outcomes for children; and reduce the health burden and health care costs during childhood and later life (Colagiuri et al. 2010; Hayes et al. 2016; Pan et al. 2013; Wake et al. 2009).

While many different types of interventions to prevent or treat childhood obesity have been trialled (Luckner, Moss & Gericke 2012; Waters et al. 2011), these have generally shown limited feasibility and/or success. In the absence of successful interventions, invasive procedures such as bariatric surgery have increasingly been used to reduce body mass index (BMI) in teens with obesity as well as children as young as nine years (Treadwell, Sun & Schoelles 2008). However, these procedures are costly to the health system and are a high-risk rather than population-level solution (Wake et al. 2009). Downstream interventions targeting at-risk children and their parents through screening and provision of primary-care based interventions have generally been ineffective in reducing BMI (Swinburn et al. 2011). Of the more upstream interventions, few achieved reductions in the BMI of children (Waters et al. 2011), and those that did, have not demonstrated long term benefits (Shaya et al. 2008; Waters et al. 2011). The most promising strategies for preventing childhood obesity appear to be multifaceted - engaging a range of actions and actors to target multiple risk-factors across multiple levels (e.g. individuals, schools and whole communities) (Waters et al. 2011) (Wilkie, 2016).

Building on the existing evidence, the Whole of Systems Trial Of Prevention Strategies for childhood obesity (WHO STOPS) will evaluate the impact of a novel intervention that aims to engage whole communities in a locally led multifaceted response (Allender et al. 2016). This systems-based intervention is underpinned by systems thinking (Hovmand 2014; Sterman 2000) and collective impact (Allender et al. 2016; Kania & Kramer 2011). WHO STOPS aims to reduce childhood BMI-z and obesity prevalence by supporting community leaders to

1  
2  
3 change food and physical activity (PA) environments, and related behaviours (Allender et al.  
4 2016).

5  
6  
7 Assessing cost-effectiveness of new interventions is critical to priority setting and funding  
8 decisions (Oortwijn, Mathijssen & Banta 2010; Stafinski et al. 2011). There are few trials  
9 employing systems-based thinking for childhood obesity prevention and consequently little  
10 rigorous evaluation of cost-effectiveness of these approaches (Malakellis et al. 2017). This is  
11 due to the relatively recent emergence of this approach to childhood obesity prevention and  
12 also the methodological challenges for economic evaluation; where well-established  
13 economic evaluation frameworks provide only limited guidance on assessing complex and  
14 adaptive interventions (Drummond, Stoddart & Torrance 2005; Husereau et al. 2013). That  
15 said, modelling and trial-based evidence suggests multifaceted preventive strategies –  
16 particularly targeting schools – have real potential to be cost-effective (Haby et al. 2006;  
17 McAuley et al. 2010; Moodie et al. 2013), making the case for a rigorous economic  
18 evaluation of WHO STOPS. This paper presents a protocol (incorporating a discussion of  
19 key challenges) for the economic evaluation of the WHO STOPS childhood obesity  
20 intervention to address the research question:

21  
22  
23  
24  
25  
26  
27  
28 *From the funder/organiser and societal perspectives, what is the cost-effectiveness*  
29 *of the WHO STOPS childhood obesity intervention compared with current practice in*  
30 *regional and rural communities in Victoria, Australia?*  
31

## 32 33 34 **2. About the trial**

### 35 **2.1 Study design**

36  
37 WHO STOPS is a stepped-wedge, cluster randomised controlled trial (C-RCT). The trial  
38 design is described in detail in Allender et al. (2016). In brief, ten dispersed clusters or  
39 'natural communities' (based on existing local government, health service and education  
40 boundaries) in the South Western Region of Victoria (Australia) were randomly assigned to  
41 receive the intervention at Step 1 (2017) – referred to as intervention communities, or Step 2  
42 (2019) referred to as control communities (See Table 1). Note the timing of implementation  
43 has been updated from Allender et al. (2016). The region has 360,000 inhabitants and  
44 population clusters range in size from around 3,200 to 20,800 people.  
45  
46  
47  
48  
49

### 50 **2.2 The intervention**

51 The intervention has three main components.

#### 52 53 54 *(1) Community engagement and facilitation (Component One)*

55 Firstly, community leaders will engage in at least two Group Model Building (GMB) sessions.  
56  
57  
58  
59  
60



The research team will facilitate the construction of a causal loop diagram (CLD) that visually describes from the community leaders' points of view, the shared understanding of the drivers of childhood obesity in their community and the interactions between such drivers (Hovmand 2014; Sterman 2000; Vennix 1996). Figure 1 provides an example of a community leaders' CLD (Allender et al. 2015). All community members are then invited to participate in a whole of community session (or sessions), where participants will (a) review the CLD, (b) identify points across the CLD where community-led actions to reduce obesity-related risk factors can be designed and implemented, and (c) form community action groups to take ownership of these proposed actions.

FIGURE 1. Sample of a causal loop diagram

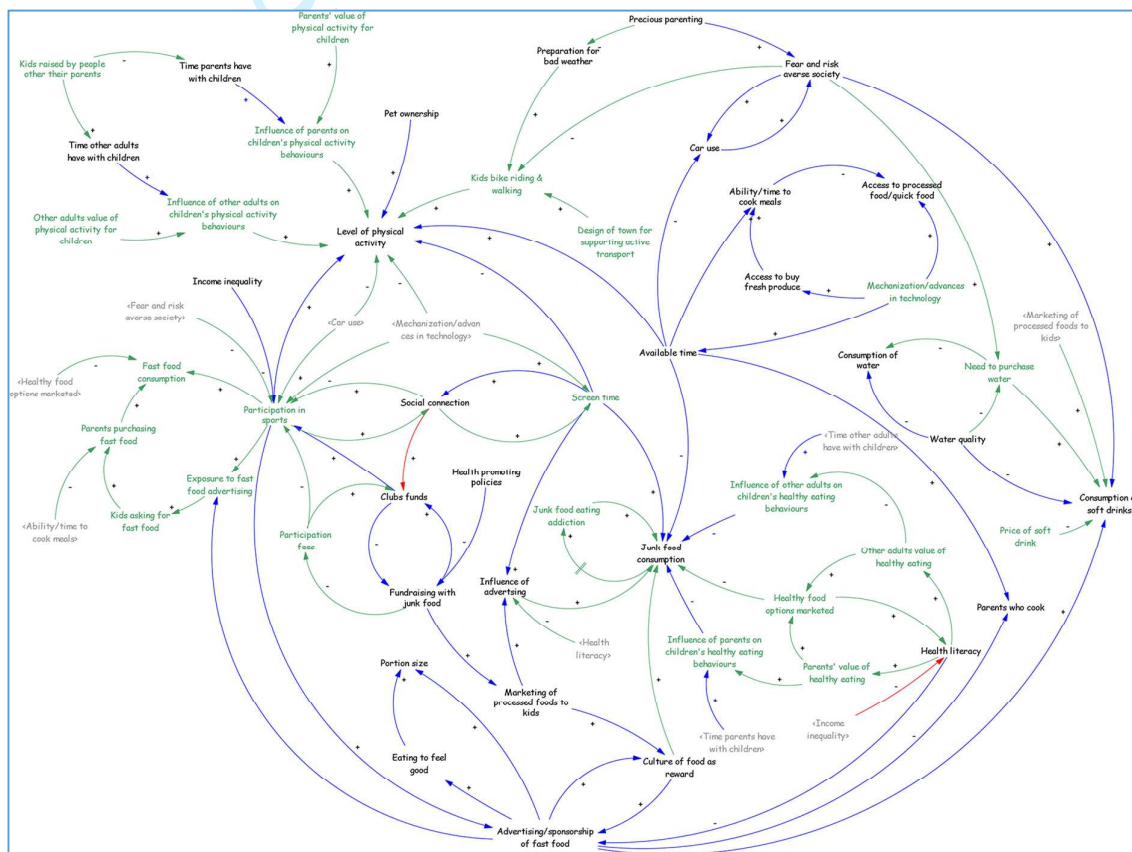

Source: Allender, S, Owen, B, Kuhlberg, J, Lowe, J, Nagorcka-Smith, P, Whelan, J & Bell, C 2015, 'A Community Based Systems Diagram of Obesity Causes', PLOS ONE, vol. 10, no. 7, p. e0129683 (approved for use under the Creative Commons open access license - CC BY).

Built on a behavioural and anthropometry school based monitoring program, childhood obesity and associated risk factor data collected in primary schools of the same community

1  
2  
3 (see Crooks et al. (2016)) will be presented during the GMB and whole of community  
4 sessions.  
5

### 6 7 *(2) Backbone organisation (Component Two)*

8 The WHO STOPS process uses a collective impact approach (Allender et al. 2016; Kania &  
9 Kramer 2011) which seeks to identify and support a local “backbone” organisation that will  
10 take significant responsibility for fostering, supporting and monitoring the community-led  
11 actions (described in Component Three). It is anticipated that this role will include facilitating  
12 WHO STOPS action planning and review meetings, tracking and providing feedback of  
13 community-led actions to the community. During a pilot testing phase in a proximal,  
14 comparable town, the backbone organisation was a locally-based public health organisation  
15 that allocated personnel time to these tasks.  
16  
17  
18  
19  
20  
21

22 Components One and Two capture the reproducible element of the intervention and will be  
23 directly facilitated by the implementation specialists from the WHO STOPS research team.  
24 The timing of the establishment of the backbone organisation however, may occur prior to,  
25 during or after Component One. The end of the whole of community session(s), where  
26 community-led actions are agreed upon, will mark the full implementation of the intervention  
27 dose.  
28  
29  
30  
31

### 32 *(3) Community-led actions (Component Three).*

33 Component Three consists of the planning and implementation by community members, of  
34 the suite of actions identified in their whole of community sessions, as well as any actions  
35 subsequently taken in the community that were motivated by Component One. The aim will  
36 be to undertake numerous actions across multiple points in the community thereby  
37 addressing a range of obesity-related risk factors. Actions might be led by community  
38 organisations (including local government, health services, schools and sporting clubs),  
39 businesses, community groups or individuals. Any resources required to implement  
40 proposed actions will be sourced by communities, primarily from within existing community  
41 resources. This strategy will result in Component Three being unique in each of the five  
42 intervention communities.  
43  
44  
45  
46  
47  
48  
49

## 50 **2.3 Control communities**

51 Current practice will be observed in control (Step 2) communities. This will include any local  
52 strategies targeting obesity-related risk factors implemented at the community level. Current  
53 practice itself is dynamic as communities introduce new and phase out old local strategies.  
54  
55  
56  
57  
58  
59  
60

Implementation of the intervention in control communities will be completed two years after implementation in intervention (Step 1) communities (2019) (see Table 1).

Table 1. WHO STOPS stepped wedge cluster RCT design

| Community               | Pre-intervention<br>baseline<br>(2015-2016) | Step 1<br>(2017 - 2018) | Step 2<br>(2019 – 2020) |
|-------------------------|---------------------------------------------|-------------------------|-------------------------|
| Group 1 (5 communities) | Control                                     | Control                 | Intervention            |
| Group 2 (5 communities) | Control                                     | Intervention            | Intervention            |

Measurement times → 2015                      2017                      2019                      2021

### 3. Challenges for conducting economic evaluation of a whole of system intervention

The characteristics of this novel systems-based childhood obesity prevention strategy introduce a number of practical challenges for the application of standard economic evaluation methods.

#### 3.1 Defining the intervention

From the funder/organiser perspective, the intervention could be viewed as limited to Component One, with the establishment of a Backbone organisation (Component Two) and the range of community actions generated (Component Three) – important intermediate outcomes. However, from a broader societal perspective, those (Component Three) community actions are a prerequisite for obesity-related behaviour change and as such can be considered an active component of the intervention. From this perspective, understanding the resources harnessed from within the community to affect any potential change in childhood overweight and obesity is important. Adding further complexity, each community will develop its own non-prescribed set of actions - as a result of differing priorities (determined via Component One), and at least partly as a result of the capacity provided by their backbone organisation and the approach it takes. As a result, each community's Component Three will be unique, non-standardised and tailored to its own specific needs and resource capacity.

#### 3.2 Assessing the costs

Whilst costing Components One and Two will be relatively straightforward, the task of costing Component Three will be large and complex. Implemented actions (Component Three) will occur across numerous sectors/settings (e.g. health, education, local

1  
2  
3 government, transport, local commerce, sport and recreation), making identification of costs  
4 difficult. Implementing parties may be well-defined (e.g. local department of health, local  
5 municipal government, school, sports club) or smaller and informal (e.g. households or a  
6 group of parents). Beyond identification, “best practice” micro-costing of the potentially  
7 hundreds of discrete actions that may result across multiple communities, is not feasible  
8 given this and most research projects’ resource constraints.  
9  
10  
11

12  
13 Attributing costs of a community action to the intervention in itself provides challenges  
14 particularly when:  
15

- 16 (a) an action has a set of aims and/or targets group broader than children;
- 17 (b) an action was motivated by observing other activities in theirs or other communities,  
18 rather than resulting from participation at the original community GMB sessions (i.e.  
19 how many degrees of separation should be allowed for spin-off actions to be  
20 included?);
- 21 (c) the intervention was only a tipping point, where years of community attention  
22 afforded a given action brought the community to a point of readiness to implement;  
23 and  
24 (d) an action is somewhat distal to the primary aim of the intervention but was identified  
25 as an obesity-related risk factor by that community (e.g. targeting parental drug and  
26 alcohol use to improve parenting skills).  
27  
28  
29  
30  
31  
32  
33

34 Whilst not unique to this intervention, this research is part of a much larger research effort  
35 and there is a genuine risk of overburdening community members with data collection at the  
36 risk of undermining community support (Gubbels et al. 2015). The costing method applied  
37 requires achievement of a balance between data comprehensiveness, feasibility and  
38 community sensitivity.  
39  
40  
41  
42

### 43 **3.3 Assessing the benefits.**

44 The benefits of the whole of systems intervention may extend beyond the primary outcome  
45 and target population. For example, any resulting improvement in a child’s eating and PA  
46 behaviours may extend to other household members (Frew 2016); or the strengthening of a  
47 community’s networks and leadership may improve its capacity to address other health and  
48 non-health related issues (Johnson et al. 2017). Further, the intervention may result in  
49 multiple community actions, which are iterative in their development and interact in a non-  
50 linear fashion creating intended and unintended consequences, either of a positive or  
51 negative nature (Shiell, Hawe & Gold 2008; Sterman 2006). Such a systems-based  
52 intervention seeks to create “system shifts” and establish new societal norms around  
53  
54  
55  
56  
57  
58  
59  
60

1  
2  
3 obesity-related behaviours; predicting the nature and extent of change beyond the trial  
4 period is difficult. These innovative intervention strategies require novel assessment  
5 techniques or adaptation of existing methods. Scenario analyses using system dynamics  
6 models (Sterman 2006) may provide a framework to predict the likelihood of such system  
7 shifts (the potential use of which will be explored in this trial).  
8  
9

### 10 11 12 **3.4 Lessons from the literature.**

13 The CHEERS guidelines for reporting economic evaluations (Husereau et al. 2013) remain  
14 generally appropriate for this systems-based intervention, and some relevant lessons can be  
15 drawn from economic evaluations of complex public health interventions that share some of  
16 these challenges (Frew 2016; Hawe et al. 2004; Husereau et al. 2014; Shieff, Hawe & Gold  
17 2008; Tudor Edwards, Charles & Lloyd-Williams 2013; Weatherly et al. 2009). However, the  
18 level of detail embedded in these resources is insufficient to provide practical guidance on all  
19 of the methodological decisions required (Lung 2017). Frew (2016) argues (in the context of  
20 childhood obesity interventions) that such challenges require creativity, with decision rules  
21 made and justified on a case-by-case basis, whilst keeping the needs of decision-makers  
22 foremost in mind.  
23  
24  
25  
26  
27  
28  
29  
30

## 31 **4. Methods and analysis**

### 32 **4.1 Economic evaluation overview**

33  
34 A cost-effectiveness evaluation will be conducted with incremental cost-effectiveness ratios  
35 (ICER) calculated for the cost (\$AUD) per BMI unit saved and quality adjusted life year  
36 (QALY) gained. Results will be analysed at the commencement of Step 2 implementation  
37 (2019), when a comparison of the intervention versus current practice can be made. Results  
38 will also be analysed after four years (two years post Step 2 implementation (2021) to  
39 identify the evolution and sustainability of community responses (including resource use)  
40 and any treatment effect. Costs and benefits will be modelled over the rest-of-life, until the  
41 study cohort of children has either died or reached 100 years of age. The dollar value of  
42 community resources harnessed for \$1 investment into Component One will also be  
43 estimated. All costs will be inflated to current Australian dollars for the year of study  
44 completion using the all-items Consumer Price Index from the Australian Bureau of  
45 Statistics. All costs and benefits will be converted to present values using an annual discount  
46 rate of 5% in the base-case, and annual rates of 3.5% and 0% in sensitivity analysis  
47 (Department of Health, 2016).  
48  
49  
50  
51  
52  
53  
54  
55  
56  
57  
58  
59  
60

Two perspectives will be taken. Firstly, a funder/organiser perspective will be adopted, where the relevant intervention costs pertain to Components One and Two. This perspective is broadly equivalent to what Frew (2016) describes as a “Local Authorities” perspective, where a community’s leaders in local government, health services and primary schools (each having remit over health and wellbeing of children in their communities), will (collectively) be most likely responsible for sourcing funds to facilitate the first Component of a WHO STOPS style strategy beyond the trial setting, as well as providing resources for the backbone role (Component 2). As such, this perspective will have most utility for local decision-makers. Depending on the funding source of the identified backbone organisations, it is possible this funder/organiser perspective will overlap significantly with a state government perspective. Secondly, a societal perspective will be taken, which will include the costs of resources contributed by the broader community through Component Three, as well as future health system cost offsets. Whilst it is expected that community actions will largely be resourced by reallocations of existing resources and funds, the associated opportunity costs require identification. This perspective will be of value for funding decision-making at higher levels (e.g. state, national) where broader comparisons of relative cost-effectiveness within and across health silos are made, as well as for communities considering such a strategy, so they are fully aware that any treatment effect observed in this trial may have been mediated by the scale of community resources (e.g. volunteer hours) contributed in those communities.

Given the burden associated with costing, the costing of Components Two and Three will be restricted to two intervention communities and two control communities. These will be selected by the research team in consultation with external partners using the following considerations: (i) there is comparability in the population size of intervention and control communities, (ii) the selected communities have some generalisability from the perspective of decision-makers, and most importantly (iii) backbone organisation agrees to participate in data provision and collection for the economic evaluation. To capture broader less quantifiable issues that are of concern to policymakers, WHO STOPS will also be assessed against other implementation considerations (strength of evidence, equity, acceptability to stakeholders, sustainability, feasibility of implementation, and potential side effects) as per the approach developed and employed by Carter et al (2009). These will be assessed by the research team in consultation with backbone organisations and other community partners.

#### **4.2 Identification, measurement and valuation of Outcomes**

*Health and health-related behavioural outcomes.*

1  
2  
3 Primary (BMI change) and secondary (PA and dietary behaviours) outcome data will be  
4 collected from participating primary schools as described in Crooks et al. (2016) and the  
5 intervention effect assessed as described in Allender et al. (2016).  
6  
7  
8  
9

### 10 *Quality of life*

11 Health-related quality of life (HRQoL) data will be collected (see Crooks et al. (2016)) using  
12 the PedsQL™ 4.0 Child Report (8-12 years). The PedsQL is a non-preference-based 23  
13 item instrument that assesses functioning across physical, emotional, social and school  
14 domains, where responses are transformed to a score on a 0-100 scale; higher scores  
15 reflect better HRQoL (Varni, Seid & Kurtin 2001). Given PedsQL is a non-preference-based  
16 HRQoL instrument, an algorithm will be developed using best practice methods, to enable  
17 conversion of PedsQL overall scores of study participants to the preference-based  
18 Children's Health Utility 9 Dimension (CHU-9D) index (Stevens 2012; Wailoo et al. 2017).  
19 This will enable estimation of any resulting QALY gains (Wailoo et al. 2017).  
20  
21  
22  
23  
24  
25

### 26 *System changes*

27 Proxy indicators of system change will be measured at baseline and followed-up annually.  
28 The number of community actions will be tracked (and dollar value of resources utilised  
29 estimated) as proxies of community level engagement. Social network analysis (SNA)  
30 methods will be used to measure structural changes in community leadership networks  
31 (Valente et al. 2015). Assessments of changes in the obesity policy, infrastructure and  
32 leadership environment will be measured through a readiness to change (RTC) analysis  
33 (Plested et al. 2006). These indicators will inform analysis of the other implementation  
34 considerations.  
35  
36  
37  
38  
39  
40

### 41 *Future health and HRQoL benefits*

42 An existing multi-state life table Markov model will be used. Described in detail in Brown  
43 (2017), the model estimates (for the 2010 Australian population) the extent to which changes  
44 in BMI and physical activity (independent of BMI), impact on the incidence and associated  
45 health care costs of osteoarthritis of the knee and hip, breast cancer, colon cancer,  
46 endometrial cancer, kidney cancer, ischaemic heart disease, hypertensive heart disease,  
47 stroke and type 2 diabetes; all causally related to obesity. The model was built in Excel  
48 (Microsoft Office 2003) and uses the add-in tool Ersatz (EpiGear, Version 1.0) for uncertainty  
49 analysis.  
50  
51  
52  
53  
54  
55

## 56 **4.3 Identification and measurement of costs**

Table 2 summarises the cost inclusions and data collection strategy for Components One, Two and Three. The planned approach for identification and measurement of costs will utilise a community's backbone organisation to track community actions and collect data on related resource use for planning and implementation of given actions. This approach has been developed in collaboration with team members of such a backbone organisation and takes into consideration their capacity to collect data for research purposes, which may be beyond their own data needs for evaluation and community feedback.

Table 2. Cost inclusions and sources of costing data.

| Included costs                                                                                                                                                                                                                                                                    | Data sources                                               | Timing of cost data collection                |
|-----------------------------------------------------------------------------------------------------------------------------------------------------------------------------------------------------------------------------------------------------------------------------------|------------------------------------------------------------|-----------------------------------------------|
| <b>Component 1 (Community engagement and facilitation)</b>                                                                                                                                                                                                                        |                                                            |                                               |
| BMI data collection. Costs included: personnel time, travel costs, equipment (scales, tablets etc.)                                                                                                                                                                               | Project administrative records.                            | Every two years.                              |
| GMBs and whole of community sessions. Costs included: personnel time (facilitators and participants), travel venue/catering, printing/ stationery, STICK-E software licence <sup>a</sup> ,                                                                                        | Project administrative records, meeting attendance sheets. | Ongoing over 3-9 month period implementation. |
| Personnel time and related administrative costs in organising, preparing and reporting results of GMB sessions, supporting backbone organisations, and maintenance of community support web-site.                                                                                 | Project administrative records.                            | Annually.                                     |
| <b>Component 2 (the role of the backbone organisation)</b>                                                                                                                                                                                                                        |                                                            |                                               |
| Personnel time and related administrative costs in organising meetings of local WHO STOPS working groups and committees, advising and supporting other organisations and community members to plan and implement actions, track and feedback progress and "stories" to community. | Project administrative records, key informant interviews.  | Annually.                                     |
| Meeting facilitation and travel costs.                                                                                                                                                                                                                                            | Project administrative records, key informant interviews.  | Annually.                                     |
| Communication costs including printing and dissemination of newsletters and advertising of meetings and activities.                                                                                                                                                               | Project administrative records, key informant interviews.  | Annually.                                     |
| <b>Component 3 (Community-led actions)</b>                                                                                                                                                                                                                                        |                                                            |                                               |



| Included costs                                                                                                                                                                                                                                                                                                                                                      | Relevant Stakeholder                                                                             | Data sources                                                                                                                                                     | Timing of cost data collection                                          |
|---------------------------------------------------------------------------------------------------------------------------------------------------------------------------------------------------------------------------------------------------------------------------------------------------------------------------------------------------------------------|--------------------------------------------------------------------------------------------------|------------------------------------------------------------------------------------------------------------------------------------------------------------------|-------------------------------------------------------------------------|
| Community Participation in Backbone facilitated meetings.                                                                                                                                                                                                                                                                                                           | Local Authorities (e.g. local government, health services, primary schools) & broader community. | Backbone organisation administrative records.                                                                                                                    | Annually                                                                |
| Community Actions.<br>Costs included:<br><ul style="list-style-type: none"> <li>• person-time (planning and implementing actions; follow-up meetings of community progress),</li> <li>• venue hire, and equipment (e.g. cooking equipment, sporting equipment),</li> <li>• Infrastructure investment (e.g. community garden, water fountain, bike path).</li> </ul> | “Local Authorities“ (e.g. local government, health services, primary schools)                    | Backbone’s action register, Community case studies, document review and key informant interviews.                                                                | Baseline (IC) then at years 2 and 4 (IC & CC).                          |
|                                                                                                                                                                                                                                                                                                                                                                     | Primary schools (Additional)                                                                     | Survey of school actions.                                                                                                                                        | At years two and four (IC & CC).                                        |
|                                                                                                                                                                                                                                                                                                                                                                     | Broader community                                                                                | Review of current community actions during whole of community sessions (Component One)<br><br>Action register, community case studies. Key informant interviews. | Baseline (ICs) and year 2 (CC).<br><br>At years 2 (IC) and 4 (IC & CC). |

<sup>a</sup> STICK-E (Systems Thinking in Community Knowledge Exchange) is a web-based software developed to aid GMB sessions. IC – intervention communities, CC – control communities.

Should an action result in an organisation moving funds between obesity-related programmes (i.e. no net change in obesity-related programme funding), the costs associated with the newly funded activity will not be included in the cost-effectiveness analysis, though the new activity will be identified and documented. Given the intractability of such data - changes in household expenditure on food and physical activity, and changes in revenue flowing to local retailers as a result of Component Three actions will be excluded. The costs of designing and developing the process for engaging and facilitating community actions (Component One), and STICK-E will be excluded as they largely pre-exist this trial and will have wider use beyond this childhood obesity prevention intervention.

1  
2  
3  
4 To assess the extent to which an identified action is attributable to WHO STOPS, at least  
5 two backbone team members (or relevant key informants) will respond to the following  
6 questions for each identified action:  
7

- 8 a) Was the action commenced after Component Three was implemented?  
9  
10 b) Is there a known link between WHO STOPS and the action?  
11  
12 c) Were any participants in planning or implementing the given action also  
13 involved in any WHO STOPS Group Model Building Sessions?  
14  
15 d) Was the implemented action intended to directly or indirectly address  
16 childhood obesity?  
17  
18 e) What proportion of the target population were children?  
19  
20 f) Were new resources allocated to obesity-related actions?  
21  
22 g) To what extent do you think the WHO STOPS intervention motivated  
23 implementation of the given action – (select one response: not at all, a little,  
24 somewhat, a lot, completely).  
25

26  
27 The collection of resource use data relating to current practice in the control communities will  
28 differ in some respects. Backbone organisations will not be actively established by the  
29 research team until close to Step 2 implementation. This will minimise researcher-led  
30 contamination of the control communities, but will result in a reliance on retrospective  
31 identification of community actions in those communities (as set out in Table 1) and raises  
32 the risk of failing to identify “current practice” actions that occurred. This potential for recall  
33 bias reinforces the importance of taking steps to assess attribution of actions to WHO  
34 STOPS in the intervention communities.  
35  
36  
37  
38  
39  
40

#### 41 **4.4 Valuation of resource use**

42  
43 The time contributions of individuals (professional and volunteer time) will be costed using  
44 opportunity cost principles. Resource use of non-health sector goods and services will be  
45 valued at market prices and be informed by best available evidence from Australian based  
46 studies. Where relevant, health resources will be costed as per the Manual of Resource  
47 Items for use in submissions to the Commonwealth of Australia's Pharmaceutical Benefits  
48 Advisory Committee (Department of Health 2016).  
49  
50  
51  
52

53  
54 Where the data collection strategy results in insufficient detail for an identified community  
55 action, evidence of costs may be drawn from comparable community-based obesity  
56 prevention activities. The anticipated large number of community-led actions likely to be  
57  
58  
59

1  
2  
3 identified and logged in a backbone's action register will deem it infeasible to collect detailed  
4 data on resource use for each registered action. As such, each action will be classified into  
5 small, medium and large (in terms of resource intensity) by backbone organisation  
6 personnel. A sample from each classification will then be costed in detail, with results  
7 extrapolated.  
8  
9

#### 10 11 12 13 **4.5 Uncertainty and scenario analyses**

14  
15 It is possible that other family members of targeted children and the broader community may  
16 also benefit from the WHO STOPS intervention in terms of BMI change (Frew 2016).  
17 Furthermore, the intervention may result in (a) productivity gains given potentially reduced  
18 child absenteeism from school for obesity-related reasons leading to lower parent  
19 absenteeism from work, and (b) improved future income levels arising from improved  
20 schooling outcomes (Black et al 2015; Cawley 2010). Best available evidence on such  
21 broader potential costs and benefits will be sought and included in scenario analyses.  
22  
23  
24  
25  
26

27 Extensive analyses will be undertaken to test the sensitivity of results to plausible variations  
28 in all trial-based and modelled variables, including assumptions around the maintenance of  
29 any observed changes in BMI, PA and fruit and vegetable consumption as well the costs of  
30 alternative approaches to GMB facilitation (where local community members are trained to  
31 facilitate). Further, in the event that BMI changes are observed in children, the potential  
32 impact on the intervention's cost-effectiveness of broader "family effects" will be investigated  
33 in scenario analyses. The potential for system dynamics models to estimate the impact of  
34 "system-wide" changes on future obesity-related behaviours and prevalence will be explored  
35 and considered for use in scenario analyses.  
36  
37  
38  
39  
40  
41

#### 42 **5. Conclusion**

43  
44 Obesity is associated with poorer health and quality of life - its prevalence is high and rising  
45 in many countries (Hruby & Hu 2015). Childhood obesity can have detrimental health and  
46 wellbeing implications during childhood and is a major predictor of obesity in adulthood and  
47 its serious and expensive associated conditions (Llewellyn et al. 2016). Community-based  
48 strategies have been effective in achieving some reductions in population BMI, but these  
49 have not been sustained. The WHO STOPS intervention builds on this evidence base. It  
50 seeks to harness existing community resources and expand the extent of local engagement  
51 in obesity-risk reduction, across whole communities.  
52  
53  
54  
55  
56  
57  
58  
59  
60

1  
2  
3 Evaluating the cost-effectiveness of this novel systems-based intervention will help policy-  
4 makers by assessing the resource use implications of achieving any observed intervention  
5 effect. This protocol considers the main challenges posed by the economic evaluation of  
6 such a complex intervention designed to produce systems change. This protocol registers  
7 our intent to conduct this evaluation alongside the WHO STOPS Childhood Obesity Trial,  
8 and describes for transparency, the predetermined approaches for addressing the  
9 methodological challenges described and the analyses planned *a priori*. This does not  
10 preclude additional hurdles arising during the course of the project forcing additions to or  
11 deviations from this plan, but these will be openly documented during the reporting of  
12 results.  
13  
14  
15  
16  
17  
18  
19  
20  
21  
22  
23  
24  
25  
26  
27  
28  
29  
30  
31  
32  
33  
34  
35  
36  
37  
38  
39  
40  
41  
42  
43  
44  
45  
46  
47  
48  
49  
50  
51  
52  
53  
54  
55  
56  
57  
58  
59  
60

## 6. References

- Allender, S, Millar, L, Hovmand, P, Bell, C, Moodie, M, Carter, R, Swinburn, B, Strugnell, C, Lowe, J, de la Haye, K, Orellana, L & Morgan, S 2016, 'Whole of Systems Trial of Prevention Strategies for Childhood Obesity: WHO STOPS Childhood Obesity', *Int J Environ Res Public Health*, vol. 13, no. 11.
- Allender, S, Owen, B, Kuhlberg, J, Lowe, J, Nagorcka-Smith, P, Whelan, J & Bell, C 2015, 'A Community Based Systems Diagram of Obesity Causes', *PLOS ONE*, vol. 10, no. 7, p. e0129683.
- Australian Bureau of Statistics 2016, *National Health Survey: First Results, 2014-15.*, Australian Bureau of Statistics, Commonwealth of Australia., Canberra, Australia.
- Brown, V, Moodie, M, Cobiac, L, Mantilla Herrera, AM & Carter, R 2017, 'Obesity-related health impacts of fuel excise taxation- an evidence review and cost-effectiveness study', *BMC Public Health*, vol 17, no. 1, p.359.
- Black, N, Johnston, DW, Peeters, A. 2015, 'Childhood obesity and cognitive achievement', *Health Economics*, vol.24, no.9, pp.1082-1100.
- Carter, R, Moodie, M, Markwick, A, Magnus, A, Vos, T, Swinburn, B & Haby, MM 2009, 'Assessing Cost-Effectiveness in Obesity (ACE-Obesity): an overview of the ACE approach, economic methods and cost results', *BMC Public Health*, vol. 9, no. 1, p. 419.
- Cawley, J. 2010, 'The economics of childhood obesity', *Health Affairs*, vol. 29, no. 3, pp. 364–371.
- Colagiuri, S, Lee, CM, Colagiuri, R, Magliano, D, Shaw, JE, Zimmet, PZ & Caterson, ID 2010, 'The cost of overweight and obesity in Australia', *Med J Aust*, vol. 192, no. 5, pp. 260-4.
- Department of Health 2016, *Guidelines for preparing a submission to the Pharmaceutical Benefits Advisory Committee (Version 5.0)*, Department of Health, Commonwealth of Australia, Canberra Australia.
- Crooks, N, Strugnell, C, Bell, C & Allender, S 2016, 'Establishing a sustainable childhood obesity monitoring system in regional Victoria', *Health Promot J Austr.*
- Drummond, MF, Stoddart, GL & Torrance, GW 2005, *Methods for the Economic Evaluation of Health Care Programmes*, Oxford University Press, Oxford.
- Duckett, S, Swerissen, H & Wiltshire, T 2016 'A sugary drinks tax: recovering the community costs of obesity', Grattan Institute. Melbourne, Australia.  
<https://grattan.edu.au/wp-content/uploads/2016/11/880-A-sugary-drinks-tax.pdf>
- Frew, E 2016, 'Economic Evaluation of Childhood Obesity Interventions: Reflections and Suggestions', *Pharmacoeconomics*, vol. 34, no. 8, pp. 733-40.
- Gubbels, JS, Mathisen, FK, Samdal, O, Lobstein, T, Kohl, LF, Leversen, I, Lakerveld, J, Kremers, SP & van Assema, P 2015, 'The assessment of ongoing community-based interventions to prevent obesity: lessons learned', *BMC Public Health*, vol. 15, no. 1, p. 216.

1  
2  
3 Haby, MM, Vos, T, Carter, R, Moodie, M, Markwick, A, Magnus, A, Tay-Teo, KS & Swinburn,  
4 B 2006, 'A new approach to assessing the health benefit from obesity interventions in  
5 children and adolescents: the assessing cost-effectiveness in obesity project', *Int J Obes*,  
6 vol. 30, no. 10, pp. 1463-75.

7  
8 Han, JC, Lawlor, DA & Kimm, SY 2010, 'Childhood obesity', *Lancet*, vol. 375, no. 9727, pp.  
9 1737-48.

10  
11 Hawe, P, Shiell, A, Riley, T & Gold, L 2004, 'Methods for exploring implementation variation  
12 and local context within a cluster randomised community intervention trial', *Journal of*  
13 *Epidemiology and Community Health*, vol. 58, no. 9, pp. 788-93.

14  
15 Hayes, A, Chevalier, A, D'Souza, M, Baur, L, Wen, LM & Simpson, J 2016, 'Early childhood  
16 obesity: Association with healthcare expenditure in Australia', *Obesity*, vol. 24, no. 8, pp.  
17 1752-8.

18  
19 Hovmand, PS 2014, 'Group Model Building and Community-Based System Dynamics  
20 Process', in *Community Based System Dynamics*, Springer New York, New York, NY, pp.  
21 17-30.

22  
23 Hruby, A & Hu, FB 2015, 'The Epidemiology of Obesity: A Big Picture', *Pharmacoeconomics*,  
24 vol. 33, no. 7, pp. 673-89.

25  
26 Husereau, D, Drummond, M, Petrou, S, Carswell, C, Moher, D, Greenberg, D, Augustovski,  
27 F, Briggs, AH, Mauskopf, J & Loder, E 2013, 'Consolidated Health Economic Evaluation  
28 Reporting Standards (CHEERS) statement', *BMJ : British Medical Journal*, vol. 346.

29  
30 Husereau, D, Jacobs, P, Manns, B, Hoomans, T, Marshall, D, Tamblyn, R & on behalf of the  
31 IHEIHSPR Complex Interventions Working Group 2014, *Economic evaluation of complex*  
32 *health system interventions: a discussion paper.*, Institute of Health Economics, Edmonton  
33 Alberta, Canada.

34  
35 Johnson, K, Collins, D, Shamblen, S, Kenworthy, T & Wandersman, A 2017, 'Long-Term  
36 Sustainability of Evidence-Based Prevention Interventions and Community Coalitions  
37 Survival: a Five and One-Half Year Follow-up Study', *Prevention Science*, vol. 18, no. 5, pp.  
38 610-21.

39  
40 Kania, J & Kramer, M 2011, 'Collective impact', *Stanford Social Innovation Review*, vol. 9,  
41 no. 1, pp. 36-41.

42  
43 Llewellyn, A, Simmonds, M, Owen, CG & Woolacott, N 2016, 'Childhood obesity as a  
44 predictor of morbidity in adulthood: a systematic review and meta-analysis', *Obes Rev*, vol.  
45 17, no. 1, pp. 56-67.

46  
47 Luckner, H, Moss, JR & Gericke, CA 2012, 'Effectiveness of interventions to promote healthy  
48 weight in general populations of children and adults: a meta-analysis', *Eur J Public Health*,  
49 vol. 22, no. 4, pp. 491-7.

50  
51 Lung, TW, Muhunthan, J, Laba, T, Shiell, A, Milat, A, Jan, S 2017, 'Making guidelines for  
52 economic evaluation relevant to public health in Australia', *Australian and New Zealand*  
53 *Journal of Public Health*, vol. 41, no. 2, pp.115-117.

54  
55 Malakellis, M, Hoare, E, Sanigorski, A, Crooks, N, Allender, S, Nichols, M, Swinburn, B,  
56 Chikwendu, C, Kelly, PM, Petersen, S & Millar, L 2017, 'School-based systems change for  
57

1  
2  
3 obesity prevention in adolescents: outcomes of the Australian Capital Territory 'It's Your  
4 Move!', *Australian and New Zealand Journal of Public Health*, pp. n/a-n/a.

5  
6 McAuley, KA, Taylor, RW, Farmer, VL, Hansen, P, Williams, SM, Booker, CS & Mann, JI  
7 2010, 'Economic evaluation of a community-based obesity prevention program in children:  
8 the APPLE project', *Obesity (Silver Spring, Md.)*, vol. 18, no. 1, pp. 131-6.

9  
10 Moodie, ML, Herbert, JK, de Silva-Sanigorski, AM, Mavoa, HM, Keating, CL, Carter, RC,  
11 Waters, E, Gibbs, L & Swinburn, BA 2013, 'The cost-effectiveness of a successful  
12 community-based obesity prevention program: The be active eat well program', *Obesity*, vol.  
13 21, no. 10, pp. 2072-80.

14  
15 Ng, M, Fleming, T, Robinson, M, Thomson, B, Graetz, N, Margono, C, Mullany, EC,  
16 Biryukov, S, Abbafati, C, Abera, SF, Abraham, JP, Abu-Rmeileh, NME, Achoki, T,  
17 AlBuhairan, FS, Alemu, ZA, Alfonso, R, Ali, MK, Ali, R, Guzman, NA, Ammar, W, Anwari, P,  
18 Banerjee, A, Barquera, S, Basu, S, Bennett, DA, Bhutta, Z, Blore, J, Cabral, N, Nonato, IC,  
19 Chang, J-C, Chowdhury, R, Courville, KJ, Criqui, MH, Cundiff, DK, Dabhadkar, KC,  
20 Dandona, L, Davis, A, Dayama, A, Dharmaratne, SD, Ding, EL, Durrani, AM, Esteghamati,  
21 A, Farzadfar, F, Fay, DFJ, Feigin, VL, Flaxman, A, Forouzanfar, MH, Goto, A, Green, MA,  
22 Gupta, R, Hafezi-Nejad, N, Hankey, GJ, Harewood, HC, Havmoeller, R, Hay, S, Hernandez,  
23 L, Husseini, A, Idrisov, BT, Ikeda, N, Islami, F, Jahangir, E, Jassal, SK, Jee, SH, Jeffreys, M,  
24 Jonas, JB, Kabagambe, EK, Khalifa, SEAH, Kengne, AP, Khader, YS, Khang, Y-H, Kim, D,  
25 Kimokoti, RW, Kinge, JM, Kokubo, Y, Kosen, S, Kwan, G, Lai, T, Leinsalu, M, Li, Y, Liang, X,  
26 Liu, S, Logroscino, G, Lotufo, PA, Lu, Y, Ma, J, Mainoo, NK, Mensah, GA, Merriman, TR,  
27 Mokdad, AH, Moschandreas, J, Naghavi, M, Naheed, A, Nand, D, Narayan, KMV, Nelson,  
28 EL, Neuhouser, ML, Nisar, MI, Ohkubo, T, Oti, SO, Pedroza, A, Prabhakaran, D, Roy, N,  
29 Sampson, U, Seo, H, Sepanlou, SG, Shibuya, K, Shiri, R, Shiue, I, Singh, GM, Singh, JA,  
30 Skirbekk, V, Stapelberg, NJC, Sturua, L, Sykes, BL, Tobias, M, Tran, BX, Trasande, L,  
31 Toyoshima, H, van de Vijver, S, Vasankari, TJ, Veerman, JL, Velasquez-Melendez, G,  
32 Vlassov, VV, Vollset, SE, Vos, T, Wang, C, Wang, SX, Weiderpass, E, Werdecker, A,  
33 Wright, JL, Yang, YC, Yatsuya, H, Yoon, J, Yoon, S-J, Zhao, Y, Zhou, M, Zhu, S, Lopez, AD,  
34 Murray, CJL, Gakidou, E & Collaboration, TGBDoDO 2014, 'Global, regional and national  
35 prevalence of overweight and obesity in children and adults 1980-2013: A systematic  
36 analysis', *Lancet (London, England)*, vol. 384, no. 9945, pp. 766-81.

37  
38 Oortwijn, W, Mathijssen, J & Banta, D 2010, 'The role of health technology assessment on  
39 pharmaceutical reimbursement in selected middle-income countries', *Health Policy*, vol. 95,  
40 no. 2, pp. 174-84.

41  
42 Pan, L, Sherry, B, Park, S & Blanck, HM 2013, 'The Association of Obesity and School  
43 Absenteeism Attributed to Illness or Injury Among Adolescents in the United States, 2009',  
44 *Journal of Adolescent Health*, vol. 52, no. 1, pp. 64-9.

45  
46 Pulgarón, ER 2013, 'Childhood Obesity: A Review of Increased Risk for Physical and  
47 Psychological Comorbidities', *Clinical Therapeutics*, vol. 35, no. 1, pp. A18-A32.

48  
49 Shaya, FT, Flores, D, Gbarayor, CM & Wang, JS 2008, 'School-based obesity interventions:  
50 A literature review', *Journal of School Health*, vol. 78, no. 4, pp. 189-96.

51  
52 Shiell, A, Hawe, P & Gold, L 2008, 'Complex interventions or complex systems? Implications  
53 for health economic evaluation', *BMJ : British Medical Journal*, vol. 336, no. 7656, pp. 1281-  
54 3.

1  
2  
3 Singh, AS, Mulder, C, Twisk, JW, van Mechelen, W & Chinapaw, MJ 2008, 'Tracking of  
4 childhood overweight into adulthood: a systematic review of the literature', *Obes Rev*, vol. 9,  
5 no. 5, pp. 474-88.

6  
7 Stafinski, T, Menon, D, Philippon, DJ & McCabe, C 2011, 'Health Technology Funding  
8 Decision-Making Processes Around the World', *Pharmacoeconomics*, vol. 29, no. 6, pp. 475-  
9 95.

10  
11 Sterman, JD 2000, *Business dynamics: Systems thinking and modeling for a complex world*,  
12 Irwin McGraw-Hill, Boston.

13  
14 Sterman, JD 2006, 'Learning from Evidence in a Complex World', *American Journal of Public*  
15 *Health*, vol. 96, no. 3, pp. 505-14.

16  
17 Stevens, K 2012, 'Valuation of the Child Health Utility 9D Index', *Pharmacoeconomics*, vol.  
18 30, no. 8, pp. 729-47.

19  
20 Strugnell, C, Millar, L, Churchill, A, Jacka, F, Bell, C, Malakellis, M, Swinburn, B & Allender,  
21 S 2016, 'Healthy together Victoria and childhood obesity—a methodology for measuring  
22 changes in childhood obesity in response to a community-based, whole of system cluster  
23 randomized control trial', *Archives of Public Health*, vol. 74, p. 16.

24  
25 Swinburn, BA, Sacks, G, Hall, KD, McPherson, K, Finegood, DT, Moodie, ML & Gortmaker,  
26 SL 2011, 'The global obesity pandemic: shaped by global drivers and local environments',  
27 *Lancet*, vol. 378, no. 9793, pp. 804-14.

28  
29 Treadwell, JR, Sun, F & Schoelles, K 2008, 'Systematic Review and Meta-Analysis of  
30 Bariatric Surgery for Pediatric Obesity', *Annals of Surgery*, vol. 248, no. 5, pp. 763-76.

31  
32 Tudor Edwards, R, Charles, JM & Lloyd-Williams, H 2013, 'Public health economics: a  
33 systematic review of guidance for the economic evaluation of public health interventions and  
34 discussion of key methodological issues', *BMC Public Health*, vol. 13, no. 1, p. 1001.

35  
36 Valente, TW, Palinkas, LA, Czaja, S, Chu, K-H & Brown, CH 2015, 'Social Network Analysis  
37 for Program Implementation', *PLOS ONE*, vol. 10, no. 6, p. e0131712.

38  
39 Varni, JW, Seid, M & Kurtin, PS 2001, 'PedsQL 4.0: reliability and validity of the Pediatric  
40 Quality of Life Inventory version 4.0 generic core scales in healthy and patient populations',  
41 *Med Care*, vol. 39, no. 8, pp. 800-12.

42  
43 Vennix, JA 1996, *Group model building: Facilitating team learning using system dynamics*  
44 Wiley, Chichester.

45  
46 Wailoo, AJ, Hernandez-Alava, M, Manca, A, Mejia, A, Ray, J, Crawford, B, Botteman, M &  
47 Busschbach, J 2017, 'Mapping to Estimate Health-State Utility from Non-Preference-Based  
48 Outcome Measures: An ISPOR Good Practices for Outcomes Research Task Force Report',  
49 *Value Health*, vol. 20, no. 1, pp. 18-27.

50  
51 Wake, M, Baur, LA, Gerner, B, Gibbons, K, Gold, L & Gunn, J 2009, 'Outcomes and costs of  
52 primary care surveillance and intervention for overweight or obese children: the LEAP 2  
53 randomised controlled trial', *BMJ*, vol. 339:b3308.

54  
55 Waters, E, de Silva-Sanigorski, A, Hall, B, Brown, T, Campbell, K, Gao, Y, Armstrong, R,  
56 Prosser, L & Summerbell, C 2011, 'Interventions for preventing obesity in children. ',  
57  
58  
59



1  
2  
3 *Cochrane Database of Systematic Reviews*, vol. Issue 12. Art. No.: CD001871. DOI:  
4 10.1002/14651858.CD001871.pub3.

5  
6 Weatherly, H, Drummond, M, Claxton, K, Cookson, R, Ferguson, B, Godfrey, C, Rice, N,  
7 Sculpher, M & Sowden, A 2009, 'Methods for assessing the cost-effectiveness of public  
8 health interventions: key challenges and recommendations', *Health Policy*, vol. 93.

9  
10 Williams, EP, Mesidor, M, Winters, K, Dubbert, PM & Wyatt, SB 2015, 'Overweight and  
11 Obesity: Prevalence, Consequences, and Causes of a Growing Public Health Problem', *Curr*  
12 *Obes Rep*, vol. 4, no. 3, pp. 363-70.

13  
14  
15  
16  
17  
18  
19  
20  
21  
22  
23  
24  
25  
26  
27  
28  
29  
30  
31  
32  
33  
34  
35  
36  
37  
38  
39  
40  
41  
42  
43  
44  
45  
46  
47  
48  
49  
50  
51  
52  
53  
54  
55  
56  
57  
58  
59  
60

For peer review only

# BMJ Open

## Protocol for an economic evaluation of the WHO STOPS childhood obesity stepped wedge cluster randomised controlled trial

|                                 |                                                                                                                                                                                                                                                                                                                                                                                                                                                                                                                                                                                                                                                                                                                                                                                                                                                                                                                                                                                                                                                                                                                                                                                                                                               |
|---------------------------------|-----------------------------------------------------------------------------------------------------------------------------------------------------------------------------------------------------------------------------------------------------------------------------------------------------------------------------------------------------------------------------------------------------------------------------------------------------------------------------------------------------------------------------------------------------------------------------------------------------------------------------------------------------------------------------------------------------------------------------------------------------------------------------------------------------------------------------------------------------------------------------------------------------------------------------------------------------------------------------------------------------------------------------------------------------------------------------------------------------------------------------------------------------------------------------------------------------------------------------------------------|
| Journal:                        | <i>BMJ Open</i>                                                                                                                                                                                                                                                                                                                                                                                                                                                                                                                                                                                                                                                                                                                                                                                                                                                                                                                                                                                                                                                                                                                                                                                                                               |
| Manuscript ID                   | bmjopen-2017-020551.R1                                                                                                                                                                                                                                                                                                                                                                                                                                                                                                                                                                                                                                                                                                                                                                                                                                                                                                                                                                                                                                                                                                                                                                                                                        |
| Article Type:                   | Protocol                                                                                                                                                                                                                                                                                                                                                                                                                                                                                                                                                                                                                                                                                                                                                                                                                                                                                                                                                                                                                                                                                                                                                                                                                                      |
| Date Submitted by the Author:   | 09-Feb-2018                                                                                                                                                                                                                                                                                                                                                                                                                                                                                                                                                                                                                                                                                                                                                                                                                                                                                                                                                                                                                                                                                                                                                                                                                                   |
| Complete List of Authors:       | Sweeney, Rohan; Deakin University School of Health and Social Development, Deakin Health Economics<br>Moodie, Marj; Deakin University School of Health and Social Development, Deakin Health Economics<br>Nguyen, Phuong; Deakin University School of Health and Social Development, Deakin Health Economics<br>Fraser, Penny; Deakin University School of Health and Social Development, Global Obesity Centre<br>Bolton, Kristy; Deakin University School of Health and Social Development, Global Obesity Centre<br>Brown, Andrew; Deakin University School of Health and Social Development, Global Obesity Centre<br>Marks, Jennifer; Deakin University School of Health and Social Development, Global Obesity Centre<br>Crooks, Nic; Deakin University School of Health and Social Development, Global Obesity Centre<br>Strugnell, Claudia; Deakin University - Geelong Waterfront Campus, WHO Collaborating Centre for Obesity Prevention<br>Bell, Colin; Deakin University Faculty of Health,<br>Millar, Lynne; Victoria University College of Arts, Australian Health Policy Collaboration<br>Orellana, Liliana; Deakin University Faculty of Health, Biostatistics Unit<br>Allender, Steven; Deakin University, Faculty of Health |
| <b>Primary Subject Heading</b>: | Health economics                                                                                                                                                                                                                                                                                                                                                                                                                                                                                                                                                                                                                                                                                                                                                                                                                                                                                                                                                                                                                                                                                                                                                                                                                              |
| Secondary Subject Heading:      | Paediatrics, Health policy, Public health, Research methods                                                                                                                                                                                                                                                                                                                                                                                                                                                                                                                                                                                                                                                                                                                                                                                                                                                                                                                                                                                                                                                                                                                                                                                   |
| Keywords:                       | childhood obesity, Community child health < PAEDIATRICS, systems-based intervention, economic evaluation, cost effectiveness                                                                                                                                                                                                                                                                                                                                                                                                                                                                                                                                                                                                                                                                                                                                                                                                                                                                                                                                                                                                                                                                                                                  |
|                                 |                                                                                                                                                                                                                                                                                                                                                                                                                                                                                                                                                                                                                                                                                                                                                                                                                                                                                                                                                                                                                                                                                                                                                                                                                                               |

SCHOLARONE™  
Manuscripts

1  
2  
3 **Title: Protocol for an economic evaluation of the WHO STOPS childhood**  
4 **obesity stepped wedge cluster randomised controlled trial**  
5  
6

7 Rohan Sweeney<sup>1,2,3‡</sup>, Marj Moodie<sup>1,2</sup>, Phuong Nguyen<sup>1,2</sup>, Penny Fraser<sup>2</sup>, Kristy Bolton<sup>2</sup>,  
8 Andrew Brown<sup>2</sup>, Jennifer Marks<sup>2</sup>, Nic Crooks<sup>2</sup>, Claudia Strugnell<sup>2</sup>, Colin Bell<sup>2</sup>, Lynne Millar<sup>4</sup>,  
9 Liliana Orellana<sup>5</sup>, Steven Allender<sup>2</sup>  
10  
11

12  
13  
14 <sup>1</sup> Deakin University, Geelong Australia. Deakin Health Economics, Centre for Population  
15 Health Research.

16 <sup>2</sup> Deakin University, Geelong Australia, Global Obesity Centre, Centre for Population Health  
17 Research.  
18

19 <sup>3</sup> Monash University, Melbourne Australia, Centre for Health Economics.  
20

21 <sup>4</sup> Victoria University, Melbourne Australia, Australian Health Policy Collaboration.  
22

23 <sup>5</sup> Deakin University, Geelong Australia, Biostatistics Unit. Faculty of Health.  
24  
25

26 ‡ Corresponding author. Address: Centre for Health Economics, Building 75, 15 Innovation  
27 Walk, Monash University, Clayton, Victoria 3800, Australia.  
28

29 Email: rohan.sweeney@monash.edu.au. Ph: +613 99052457.  
30  
31  
32  
33  
34  
35

36 **Keywords:** childhood obesity, community prevention, systems-based intervention,  
37 economic evaluation, cost effectiveness.  
38  
39  
40  
41  
42

43 **Declarations:**

44 This study is supported by a NHMRC Partnership Project titled “Whole of Systems Trial of  
45 Prevention Strategies for childhood obesity: WHO STOPS childhood obesity”  
46 (APP1114118). The work described herein has also received funding support from the  
47 Western Alliance. Study researchers (listed in Title Page) are researchers within the  
48 NHMRC Centre for Research Excellence in Obesity Policy and Food Systems  
49 (APP1041020). We would also like to acknowledge the support from the Victorian  
50 Department of Health and Human Services, Victorian Department of Education and Training,  
51 South West Primary Care Partnership (PCP), Southern Grampians Glenelg PCP, Portland  
52 District Health, Western District Health Service, Colac Area Health, Portland Hamilton  
53  
54  
55  
56  
57  
58  
59  
60

1  
2  
3 Principal Network of Schools (NoS), Colac Corangamite NoS, Warnambool and District NoS,  
4 Glenelg Shire Council, Southern Grampians Shire Council.  
5  
6

7 Full ethics clearances have been received for all methods described below: Deakin  
8 University's Human Research Ethics Committee (DU-HREC) 2014-279, Deakin University's  
9 Human Ethics Advisory Group-Health (HEAG-H) HEAG-H 194\_2014, HEAG-H 17 2015,  
10 HEAG-H 155\_2014, HEAG-H 197\_2016, HEAG-H 118\_2017), the Victorian Department of  
11 Education and Training 2015\_002622 and the Catholic Archdiocese of Ballarat.  
12  
13  
14  
15

16  
17  
18 **Contributorship Statement:**

19 Rohan Sweeney led the conceptual design and writing of this work. Marj Moodie made  
20 substantial contributions to the conceptual design of the work as well as substantial  
21 contributions to the writing of this work. Co-authors Phuong Nguyen, Penny Fraser, Kristy  
22 Bolton, Andrew Brown, Jennifer Marks, Nic Crooks, Claudia Strugnell, Colin Bell, Lynne  
23 Millar, Liliana Orellana, Steven Allender all made substantial contributions to the conceptual  
24 design of the methods described in this Economic Evaluation Protocol, and all made  
25 important contributions in revising the manuscript critically for important intellectual content.  
26 All authors have approved of the final version of the submitted manuscript.  
27  
28  
29  
30  
31  
32  
33  
34  
35  
36  
37  
38  
39  
40  
41  
42  
43  
44  
45  
46  
47  
48  
49  
50  
51  
52  
53  
54  
55  
56  
57  
58  
59  
60

## Abstract

### Introduction

Prevention of overweight and obesity in childhood is a priority because of associated acute and chronic conditions in childhood and later in life, which place significant burden on health systems. Evidence suggests prevention should engage a range of actions and actors and target multiple levels. The Whole of Systems Trial Of Prevention Strategies for childhood obesity (WHO STOPS) will evaluate the outcomes of a novel systems-based intervention that aims to engage whole communities in a locally led multifaceted response. This paper describes the planned economic evaluation of WHO STOPS and examines the methodological challenges for economic evaluation of a complex systems-based intervention.

### Methods and analysis

Economic evaluation alongside a stepped wedge cluster RCT in regional and rural communities in Victoria, Australia. Cost-effectiveness and cost-utility analyses will provide estimates of the incremental cost (in Australian dollars) per body mass index (BMI) unit saved and quality adjusted life year (QALY) gained. A Markov cohort model will be employed to estimate healthcare cost savings and benefits over the life course of children. The dollar value of community resources harnessed for the community-led response will be estimated. Probabilistic uncertainty analyses will be undertaken to test sensitivity of results to plausible variations in all trial-based and modelled variables. WHO STOPS will also be assessed against other implementation considerations (such as sustainability and acceptability to communities and other stakeholders).

### Ethics and dissemination

The trial is registered by the Australian New Zealand Clinical Trials Registry (ACTRN12616000980437). Full ethics clearances have been received for all methods described below: Deakin University's Human Research Ethics Committee (DU-HREC) 2014-279, Deakin University's Human Ethics Advisory Group-Health (HEAG-H) HEAG-H 194\_2014, HEAG-H 17 2015, HEAG-H 155\_2014, HEAG-H 197\_2016, HEAG-H 118\_2017), the Victorian Department of Education and Training 2015\_002622 and the Catholic Archdiocese of Ballarat. Trial findings (including economic evaluation) will be published in peer reviewed journals and presented at international conferences. Collected data and analyses will be made available in accordance with journal policies and study ethics approvals. Results will be presented to relevant government authorities with an interest in cost effectiveness of these types of interventions.

### Strengths and limitations of this study

- The protocol for this novel and complex intervention is guided by the CHEERS guidelines for economic evaluation and draws lessons from literature on the economic evaluation of complex public health interventions.
- Pragmatic solutions are discussed for the core challenges this complex intervention poses for economic evaluation (e.g. defining intervention boundaries; measurement and attribution of costs to WHO STOPS).
- A range of data collection approaches will be employed to identify and measure the resources contributed across multiple sectors in participating communities.
- WHO STOPS will be assessed against other implementation considerations (strength of evidence, equity, acceptability to stakeholders, sustainability, feasibility of implementation, and potential side effects).
- This protocol provides the core elements for the economic evaluation of this adaptive multifaceted whole of systems approach. Further decisions may be required that have not yet been considered.

## 1. Introduction

Childhood obesity causes a range of acute and chronic conditions reducing mental and physical health and wellbeing.[1-3] Obese children are at higher risk of becoming obese adults, a major risk factor for diabetes, cardiovascular disease and some cancers.[1, 4, 5] The World Health Organisation (WHO) estimates that 23% of children living in developed countries are overweight or obese.[6] In Australia, the most recent National Health Survey (2014-15) indicates that 27% of children aged 7-12 years are overweight or obese.[7] It is estimated the direct costs of obesity to the health system were \$8.6 billion in the 2011/12 financial year.[8] Preventing the onset of overweight and obesity during childhood could improve physical and psychological wellbeing, and education outcomes for children; and reduce the health burden and health care costs during childhood and later life.[9-12]

While many different types of interventions to prevent or treat childhood obesity have been trialled.[13,14] these have generally shown limited feasibility and/or success. In the absence of successful interventions, invasive procedures such as bariatric surgery have increasingly been used to reduce body mass index (BMI) in teens with obesity as well as children as young as nine years.[15] However, these procedures are costly to the health system and are a high-risk rather than population-level solution.[9] Downstream interventions targeting at-risk children and their parents through screening and provision of primary-care based interventions have generally been ineffective in reducing BMI.[16] Of the more upstream interventions, few achieved reductions in the BMI of children,[13] and those that did, have not demonstrated long term benefits.[13, 17] The most promising strategies for preventing childhood obesity appear to be multifaceted - engaging a range of actions and actors to target multiple risk-factors across multiple levels (e.g. individuals, schools and whole communities).[13, 18]

Building on the existing evidence, the Whole of Systems Trial Of Prevention Strategies for childhood obesity (WHO STOPS) will evaluate the impact of a novel intervention that aims to engage whole communities in a locally led multifaceted response.[19] This systems-based intervention is underpinned by systems thinking [20, 21] and collective impact.[19, 22] WHO STOPS aims to reduce childhood BMI-z and obesity prevalence by supporting community leaders to change food and physical activity (PA) environments, and related behaviours.[19]

Assessing cost-effectiveness of new interventions is critical to priority setting and funding decisions.[23-24] There are few trials employing systems-based thinking for childhood obesity prevention and consequently little rigorous evaluation of cost-effectiveness of these approaches.[25] This is due to the relatively recent emergence of this approach to childhood

1  
2  
3 obesity prevention and also the methodological challenges for economic evaluation; where  
4 well-established economic evaluation frameworks provide only limited guidance on  
5 assessing complex and adaptive interventions.[26-27] That said, modelling and trial-based  
6 evidence suggests multifaceted preventive strategies – particularly targeting schools – have  
7 real potential to be cost-effective,[28-30] making the case for a rigorous economic evaluation  
8 of WHO STOPS. This paper presents a protocol (incorporating a discussion of key  
9 challenges) for the economic evaluation of the WHO STOPS childhood obesity intervention  
10 to address the research question:  
11  
12  
13

14 *From the funder/organiser and societal perspectives, what is the cost-effectiveness*  
15 *of the WHO STOPS childhood obesity intervention compared with current practice in*  
16 *regional and rural communities in Victoria, Australia?*  
17  
18  
19

## 20 **2. About the trial**

### 21 **2.1 Study design**

22 WHO STOPS is a stepped-wedge, cluster randomised controlled trial (C-RCT). The trial  
23 design is described in detail in Allender, et al. <sup>19</sup> In brief, ten dispersed clusters or 'natural  
24 communities' (based on existing local government, health service and education boundaries)  
25 in the South Western Region of Victoria (Australia) were randomly assigned to receive the  
26 intervention at Step 1 (2017) – referred to as intervention communities, or Step 2 (2019)  
27 referred to as control communities (See Table 1). Note the timing of implementation has  
28 been updated from Allender et al. (2016). The region has 360,000 inhabitants and  
29 population clusters range in size from around 3,200 to 20,800 people.  
30  
31  
32  
33  
34  
35  
36

### 37 **2.2 The intervention**

38 The intervention has three main components.  
39  
40

#### 41 *(1) Community engagement and facilitation (Component One)*

42 Firstly, community leaders will engage in at least two Group Model Building (GMB) sessions.  
43 The research team will facilitate the construction of a causal loop diagram (CLD) that visually  
44 describes from the community leaders' points of view, the shared understanding of the  
45 drivers of childhood obesity in their community and the interactions between such  
46 drivers.[20, 21, 31] Figure 1 provides an example of a community leaders' CLD.[32] All  
47 community members are then invited to participate in a whole of community session (or  
48 sessions), where participants will (a) review the CLD, (b) identify points across the CLD  
49 where community-led actions to reduce obesity-related risk factors can be designed and  
50 implemented, and (c) form community action groups to take ownership of these proposed  
51 actions.  
52  
53  
54  
55  
56  
57  
58  
59  
60



1  
2  
3 FIGURE 1. Sample of a causal loop diagram

4 **Please insert Figure 1 about here.**  
5  
6  
7

8  
9 Built on a behavioural and anthropometry school based monitoring program, childhood  
10 obesity and associated risk factor data collected in primary schools of the same community  
11 (see Crooks, et al.[33]) will be presented during the GMB and whole of community sessions.  
12  
13

14  
15 *(2) Backbone organisation (Component Two)*

16 The WHO STOPS process uses a collective impact approach,[19, 22] which seeks to  
17 identify and support a local “backbone” organisation that will take significant responsibility for  
18 fostering, supporting and monitoring the community-led actions (described in Component  
19 Three). It is anticipated that this role will include facilitating WHO STOPS action planning  
20 and review meetings, tracking and providing feedback of community-led actions to the  
21 community. During a pilot testing phase in a proximal, comparable town, the backbone  
22 organisation was a locally-based public health organisation that allocated personnel time to  
23 these tasks.  
24  
25  
26  
27  
28

29 Components One and Two capture the reproducible element of the intervention and will be  
30 directly facilitated by the implementation specialists from the WHO STOPS research team.  
31 The timing of the establishment of the backbone organisation however, may occur prior to,  
32 during or after Component One. The end of the whole of community session(s), where  
33 community-led actions are agreed upon, will mark the full implementation of the intervention  
34 dose.  
35  
36  
37  
38  
39

40 *(3) Community-led actions (Component Three).*

41 Component Three consists of the planning and implementation by community members, of  
42 the suite of actions identified in their whole of community sessions, as well as any actions  
43 subsequently taken in the community that were motivated by Component One. The aim will  
44 be to undertake numerous actions across multiple points in the community thereby  
45 addressing a range of obesity-related risk factors. Actions might be led by community  
46 organisations (including local government, health services, schools and sporting clubs),  
47 businesses, community groups or individuals. Any resources required to implement  
48 proposed actions will be sourced by communities, primarily from within existing community  
49 resources. This strategy will result in Component Three being unique in each of the five  
50 intervention communities.  
51  
52  
53  
54  
55  
56  
57  
58  
59  
60

### 2.3 Control communities

Current practice will be observed in control (Step 2) communities. This will include any local strategies targeting obesity-related risk factors implemented at the community level. Current practice itself is dynamic as communities introduce new and phase out old local strategies. Implementation of the intervention in control communities will be completed two years after implementation in intervention (Step 1) communities (2019) (see Table 1).

Table 1. WHO STOPS stepped wedge cluster RCT design

| Community               | Pre-intervention<br>baseline<br>(2015-2016) | Step 1<br>(2017 - 2018) | Step 2<br>(2019 – 2020) |
|-------------------------|---------------------------------------------|-------------------------|-------------------------|
| Group 1 (5 communities) | Control                                     | Control                 | Intervention            |
| Group 2 (5 communities) | Control                                     | Intervention            | Intervention            |

Measurement times → 2015                      2017                      2019                      2021

### 3. Challenges for conducting economic evaluation of a whole of system intervention

The characteristics of this novel systems-based childhood obesity prevention strategy introduce a number of practical challenges for the application of standard economic evaluation methods.

#### 3.1 Defining the intervention

From the funder/organiser perspective, the intervention could be viewed as limited to Component One, with the establishment of a Backbone organisation (Component Two) and the range of community actions generated (Component Three) – important intermediate outcomes. However, from a broader societal perspective, those (Component Three) community actions are a prerequisite for obesity-related behaviour change and as such can be considered an active component of the intervention. From this perspective, understanding the resources harnessed from within the community to affect any potential change in childhood overweight and obesity is important. Adding further complexity, each community will develop its own non-prescribed set of actions - as a result of differing priorities (determined via Component One), and at least partly as a result of the capacity provided by their backbone organisation and the approach it takes. As a result, each community's Component Three will be unique, non-standardised and tailored to its own specific needs and resource capacity.

### 3.2 Assessing the costs

Whilst costing Components One and Two will be relatively straightforward, the task of costing Component Three will be large and complex. Implemented actions (Component Three) will occur across numerous sectors/settings (e.g. health, education, local government, transport, local commerce, sport and recreation), making identification of costs difficult. Implementing parties may be well-defined (e.g. local department of health, local municipal government, school, sports club) or smaller and informal (e.g. households or a group of parents). Beyond identification, “best practice” micro-costing of the potentially hundreds of discrete actions that may result across multiple communities, is not feasible given this and most research projects’ resource constraints.

Attributing costs of a community action to the intervention in itself provides challenges particularly when:

- (a) an action has a set of aims and/or targets group broader than children;
- (b) an action was motivated by observing other activities in theirs or other communities, rather than resulting from participation at the original community GMB sessions (i.e. how many degrees of separation should be allowed for spin-off actions to be included?);
- (c) the intervention was only a tipping point, where years of community attention afforded a given action brought the community to a point of readiness to implement; and
- (d) an action is somewhat distal to the primary aim of the intervention but was identified as an obesity-related risk factor by that community (e.g. targeting parental drug and alcohol use to improve parenting skills).

Whilst not unique to this intervention, this research is part of a much larger research effort and there is a genuine risk of overburdening community members with data collection at the risk of undermining community support.[34] The costing method applied requires achievement of a balance between data comprehensiveness, feasibility and community sensitivity.

### 3.3 Assessing the benefits.

The benefits of the whole of systems intervention may extend beyond the primary outcome and target population. For example, any resulting improvement in a child’s eating and PA behaviours may extend to other household members;[35] or the strengthening of a community’s networks and leadership may improve its capacity to address other health and

1  
2  
3 non-health related issues.[36] Further, the intervention may result in multiple community  
4 actions, which are iterative in their development and interact in a non-linear fashion creating  
5 intended and unintended consequences, either of a positive or negative nature.[37, 38] Such  
6 a systems-based intervention seeks to create “system shifts” and establish new societal  
7 norms around obesity-related behaviours; predicting the nature and extent of change beyond  
8 the trial period is difficult. These innovative intervention strategies require novel assessment  
9 techniques or adaptation of existing methods. Scenario analyses using system dynamics  
10 models [37] may provide a framework to predict the likelihood of such system shifts (the  
11 potential use of which will be explored in this trial).  
12  
13  
14  
15  
16  
17

### 18 **3.4 Lessons from the literature.**

19 The CHEERS guidelines for reporting economic evaluations [26] remain generally  
20 appropriate for this systems-based intervention, and some relevant lessons can be drawn  
21 from economic evaluations of complex public health interventions that share some of these  
22 challenges.[35, 38-42] However, the level of detail embedded in these resources is  
23 insufficient to provide practical guidance on all of the methodological decisions required.[43]  
24 Frew [35] argues (in the context of childhood obesity interventions) that such challenges  
25 require creativity, with decision rules made and justified on a case-by-case basis, whilst  
26 keeping the needs of decision-makers foremost in mind.  
27  
28  
29  
30  
31  
32  
33

## 34 **4. Methods and analysis**

### 35 **4.1 Economic evaluation overview**

36 A cost-effectiveness evaluation will be conducted with incremental cost-effectiveness ratios  
37 (ICER) calculated for the cost (\$AUD) per BMI unit saved and quality adjusted life year  
38 (QALY) gained. Results will be analysed at the commencement of Step 2 implementation  
39 (2019), when a comparison of the intervention versus current practice can be made. Results  
40 will also be analysed after four years (two years post Step 2 implementation (2021)) to  
41 identify the evolution and sustainability of community responses (including resource use)  
42 and any treatment effect. Analyses of intention-to-treat and as-per-protocol (i.e. reaching  
43 Component 3) treatment effects will be undertaken. Costs and benefits will be modelled over  
44 the rest-of-life, until the study cohort of children has either died or reached 100 years of age.  
45 The dollar value of community resources harnessed for \$1 investment into Component One  
46 will also be estimated. All costs will be inflated to current Australian dollars for the year of  
47 study completion using the all-items Consumer Price Index from the Australian Bureau of  
48 Statistics. All costs and benefits will be converted to present values using an annual discount  
49 rate of 5% in the base-case, and annual rates of 3.5% and 0% in sensitivity analysis.[44]  
50  
51  
52  
53  
54  
55  
56  
57  
58  
59  
60

Two perspectives will be taken. Firstly, a funder/organiser perspective will be adopted, where the relevant intervention costs pertain to Components One and Two. This perspective is broadly equivalent to what Frew [35] describes as a “Local Authorities” perspective, where a community’s leaders in local government, health services and primary schools (each having remit over health and wellbeing of children in their communities), will (collectively) be most likely responsible for sourcing funds to facilitate the first Component of a WHO STOPS style strategy beyond the trial setting, as well as providing resources for the backbone role (Component 2). As such, this perspective will have most utility for local decision-makers. Depending on the funding source of the identified backbone organisations, it is possible this funder/organiser perspective will overlap significantly with a state government perspective. Secondly, a societal perspective will be taken, which will include the costs of resources contributed by the broader community through Component Three, as well as future health system cost offsets. Whilst it is expected that community actions will largely be resourced by reallocations of existing resources and funds, the associated opportunity costs require identification. This perspective will be of value for funding decision-making at higher levels (e.g. state, national) where broader comparisons of relative cost-effectiveness within and across health silos are made, as well as for communities considering such a strategy, so they are fully aware that any treatment effect observed in this trial may have been mediated by the scale of community resources (e.g. volunteer hours) contributed in those communities.

Given the burden associated with costing, the costing of Components Two and Three will be restricted to two intervention communities and two control communities. These will be selected by the research team in consultation with external partners using the following considerations: (i) there is comparability in the population size of intervention and control communities, (ii) the selected communities have some generalisability from the perspective of decision-makers, and most importantly (iii) backbone organisation agrees to participate in data provision and collection for the economic evaluation. To capture broader, less quantifiable issues that are of concern to policymakers, WHO STOPS will also be assessed against other implementation considerations (strength of evidence, equity, acceptability to stakeholders, sustainability, feasibility of implementation, and potential side effects) as per the approach developed and employed by Carter, et al.[45] These will be assessed by the research team in consultation with backbone organisations and other community partners.

#### **4.2 Identification, measurement and valuation of Outcomes**

*Health and health-related behavioural outcomes.*

1  
2  
3 Primary (BMI change) and secondary (PA and dietary behaviours) outcome data will be  
4 collected from children aged between about 8 and 12 years at participating primary schools  
5 using opt-out (passive) consent as described in Crooks, et al. [33] and the intervention effect  
6 assessed as described in Allender, et al.[19] PA and dietary behaviour questions will be self-  
7 completed, with students given structured prompts on how to answer the questions or to  
8 clarify terminology (as is the case for health-related quality of life (HRQoL) questionnaire –  
9 discussed below).

### 14 *Quality of life*

15  
16 HRQoL data will be collected (see Crooks, et al. [33]) using the PedsQL™ 4.0 Child Report  
17 (8-12 years). The PedsQL is a non-preference-based 23 item instrument that assesses  
18 functioning across physical, emotional, social and school domains, where responses are  
19 transformed to a score on a 0-100 scale; higher scores reflect better HRQoL.[46] Given  
20 PedsQL is a non-preference-based HRQoL instrument, an algorithm will be developed to  
21 enable conversion of PedsQL overall scores of study participants to the preference-based  
22 Children's Health Utility 9 Dimension (CHU-9D) index [47, 48]. Specifically, a dataset of  
23 around 1800 Australian children aged between 10 and 12 years will be employed. Following  
24 best practice methods, the optimal mapping algorithm will be chosen based on a series of  
25 econometric techniques using a number of goodness-of-fit measures.[47] This will enable  
26 estimation of any resulting QALY gains.[47]

### 34 *System changes*

35 Proxy indicators of system change will be measured at baseline and followed-up annually.  
36 The number of community actions will be tracked (and dollar value of resources utilised  
37 estimated) as proxies of community level engagement. Social network analysis (SNA)  
38 methods will be used to measure structural changes in community leadership networks.[49]  
39 Assessments of changes in the obesity policy, infrastructure and leadership environment will  
40 be measured through a readiness to change (RTC) analysis.[50] These indicators will inform  
41 analysis of the other implementation considerations.

### 47 *Future health and HRQoL benefits*

48 An existing multi-state life table Markov model will be used. Described in detail in Brown, et  
49 al.,[51] the model estimates (for the 2010 Australian population) the extent to which changes  
50 in BMI and physical activity (independent of BMI), impact on the incidence and associated  
51 health care costs of osteoarthritis of the knee and hip, breast cancer, colon cancer,  
52 endometrial cancer, kidney cancer, ischaemic heart disease, hypertensive heart disease,  
53 stroke and type 2 diabetes; all causally related to obesity. The model was built in Excel

(Microsoft Office 2003) and uses the add-in tool Ersatz (EpiGear, Version 1.0) for uncertainty analysis.

#### 4.3 Identification and measurement of costs

Table 2 summarises the cost inclusions and data collection strategy for Components One, Two and Three. The planned approach for identification and measurement of costs will utilise a community's backbone organisation to track community actions and collect data on related resource use for planning and implementation of given actions. A community action register, which is designed for tracking community actions and associated resource use, will be provided to each community's backbone organisation. This will facilitate data collection for economic evaluation purposes as well as aid each community's own monitoring and evaluation. This approach has been developed in collaboration with team members of such a backbone organisation and takes into consideration their capacity to collect data for research purposes, which may be beyond their own data needs for evaluation and community feedback.

Table 2. Cost inclusions and sources of costing data.

| Included costs                                                                                                                                                                                                                                        | Data sources                                               | Timing of cost data collection                |
|-------------------------------------------------------------------------------------------------------------------------------------------------------------------------------------------------------------------------------------------------------|------------------------------------------------------------|-----------------------------------------------|
| <b>Component 1 (Community engagement and facilitation)</b>                                                                                                                                                                                            |                                                            |                                               |
| BMI data collection. Costs included: personnel time, travel costs, equipment (scales, tablets etc.)                                                                                                                                                   | Project administrative records.                            | Every two years.                              |
| GMBs and whole of community sessions. Costs included: personnel time (facilitators and participants), travel venue/catering, printing/ stationery, STICK-E software licence <sup>a</sup> ,                                                            | Project administrative records, meeting attendance sheets. | Ongoing over 3-9 month period implementation. |
| Personnel time and related administrative costs in organising, preparing and reporting results of GMB sessions, supporting backbone organisations, and maintenance of community support web-site.                                                     | Project administrative records.                            | Annually.                                     |
| <b>Component 2 (the role of the backbone organisation)</b>                                                                                                                                                                                            |                                                            |                                               |
| Personnel time and related administrative costs in organising meetings of local WHO STOPS working groups and committees, advising and supporting other organisations and community members to plan and implement actions, track and feedback progress | Project administrative records, key informant interviews.  | Annually.                                     |

|                                                                                                                                                                                                                                                                                                                                                                     |                                                                                                  |                                                                                                   |                                                                    |
|---------------------------------------------------------------------------------------------------------------------------------------------------------------------------------------------------------------------------------------------------------------------------------------------------------------------------------------------------------------------|--------------------------------------------------------------------------------------------------|---------------------------------------------------------------------------------------------------|--------------------------------------------------------------------|
| and "stories" to community.                                                                                                                                                                                                                                                                                                                                         |                                                                                                  |                                                                                                   |                                                                    |
| Meeting facilitation and travel costs.                                                                                                                                                                                                                                                                                                                              |                                                                                                  | Project administrative records, key informant interviews.                                         | Annually.                                                          |
| Communication costs including printing and dissemination of newsletters and advertising of meetings and activities.                                                                                                                                                                                                                                                 |                                                                                                  | Project administrative records, key informant interviews.                                         | Annually.                                                          |
| <b>Component 3 (Community-led actions)</b>                                                                                                                                                                                                                                                                                                                          |                                                                                                  |                                                                                                   |                                                                    |
| <b>Included costs</b>                                                                                                                                                                                                                                                                                                                                               | <b>Relevant Stakeholder</b>                                                                      | <b>Data sources</b>                                                                               | <b>Timing of cost data collection</b>                              |
| Community Participation in Backbone facilitated meetings.                                                                                                                                                                                                                                                                                                           | Local Authorities (e.g. local government, health services, primary schools) & broader community. | Backbone organisation administrative records.                                                     | Annually                                                           |
| Community Actions.<br>Costs included:<br><ul style="list-style-type: none"> <li>• person-time (planning and implementing actions; follow-up meetings of community progress),</li> <li>• venue hire, and equipment (e.g. cooking equipment, sporting equipment),</li> <li>• Infrastructure investment (e.g. community garden, water fountain, bike path).</li> </ul> | "Local Authorities" (e.g. local government, health services, primary schools)                    | Backbone's action register, Community case studies, document review and key informant interviews. | Baseline (IC) then at years 2 and 4 (IC & CC).                     |
|                                                                                                                                                                                                                                                                                                                                                                     | Primary schools (Additional)                                                                     | Survey of school actions.                                                                         | At years two and four (IC & CC).                                   |
|                                                                                                                                                                                                                                                                                                                                                                     | Broader community                                                                                | Review of current community actions during whole of community sessions (Component One)            | Action register, community case studies. Key informant interviews. |

<sup>a</sup> STICK-E (Systems Thinking in Community Knowledge Exchange) is a web-based software developed to aid GMB sessions.

IC – intervention communities, CC – control communities.



1  
2  
3 Should an action result in an organisation moving funds between obesity-related  
4 programmes (i.e. no net change in obesity-related programme funding), the costs associated  
5 with the newly funded activity will not be included in the cost-effectiveness analysis, though  
6 the new activity will be identified and documented. Given the intractability of such data -  
7 changes in household expenditure on food and physical activity, and changes in revenue  
8 flowing to local retailers as a result of Component Three actions will be excluded. The costs  
9 of designing and developing the process for engaging and facilitating community actions  
10 (Component One), and STICK-E will be excluded as they largely pre-exist this trial and will  
11 have wider use beyond this childhood obesity prevention intervention.  
12  
13  
14  
15

16  
17 To assess the extent to which an identified action is attributable to WHO STOPS, at least  
18 two backbone team members (or relevant key informants) will respond to the following  
19 questions for each identified action:  
20  
21

- 22 a) Was the action commenced after Component Three was implemented?
- 23 b) Is there a known link between WHO STOPS and the action?
- 24 c) Were any participants in planning or implementing the given action also  
25 involved in any WHO STOPS Group Model Building Sessions?
- 26 d) Was the implemented action intended to directly or indirectly address  
27 childhood obesity?
- 28 e) What proportion of the target population were children?
- 29 f) Were new resources allocated to obesity-related actions?
- 30 g) To what extent do you think the WHO STOPS intervention motivated  
31 implementation of the given action – (select one response: not at all, a little,  
32 somewhat, a lot, completely).  
33  
34  
35  
36  
37  
38  
39

40 Given the intrinsic variability of component three of the intervention, it is possible that  
41 comprehensive costing of only two of the five communities might not provide an accurate  
42 representation of the potentially large between-community heterogeneity of actions and  
43 costs involved in this component. As a way to investigate this variability all communities will  
44 be encouraged to monitor community actions and resource contributions using the  
45 community action register. Prior to finishing the economic evaluation, results from the  
46 costing of the two selected intervention communities will be discussed with backbone  
47 organisations from all intervention communities. Those backbone organisations from  
48 communities not comprehensively costed will be asked to consider those results alongside  
49 the actions registered in their own registers, and reflect on the extent to which findings  
50 appear consistent with their own communities. If perceived heterogeneity is raised, this will  
51 be acknowledged as a limitation in the published economic evaluation results.  
52  
53  
54  
55  
56  
57  
58  
59  
60

1  
2  
3  
4 The collection of resource use data relating to current practice in the control communities will  
5 differ in some respects. Backbone organisations will not be actively established by the  
6 research team until close to Step 2 implementation. This will minimise researcher-led  
7 contamination of the control communities, but will result in a reliance on retrospective  
8 identification of community actions in those communities (as set out in Table 1) and raises  
9 the risk of failing to identify “current practice” actions that occurred. This potential for recall  
10 bias reinforces the importance of taking steps to assess attribution of actions to WHO  
11 STOPS in the intervention communities.  
12  
13  
14  
15

#### 16 17 18 19 **4.4 Valuation of resource use**

20 The time contributions of individuals (professional and volunteer time) will be costed using  
21 opportunity cost principles. Resource use of non-health sector goods and services will be  
22 valued at market prices and be informed by best available evidence from Australian based  
23 studies. Where relevant, health resources will be costed as per the Manual of Resource  
24 Items for use in submissions to the Commonwealth of Australia's Pharmaceutical Benefits  
25 Advisory Committee.[44]  
26  
27  
28  
29  
30

31 Where the data collection strategy results in insufficient detail for an identified community  
32 action, evidence of costs may be drawn from comparable community-based obesity  
33 prevention activities. The anticipated large number of community-led actions likely to be  
34 identified and logged in a backbone's action register will deem it infeasible to collect detailed  
35 data on resource use for each registered action. As such, each action will be classified into  
36 small, medium and large (in terms of resource intensity) by backbone organisation  
37 personnel. A sample from each classification will then be costed in detail, with results  
38 extrapolated.  
39  
40  
41  
42  
43  
44  
45

#### 46 **4.5 Uncertainty and scenario analyses**

47  
48 It is important to note some of the challenges being faced that may have implications for the  
49 estimated treatment effect. The intervention aims to make system level changes, some of  
50 which will take longer than the trial period to occur. Further, due to the variability we have  
51 observed in the time it takes communities to reach the Component 3 stage (community  
52 actions), it is likely there will be variable effects measured across communities after two  
53 years. The four year analyses to be undertaken will be comparing a maximum of four years  
54  
55  
56  
57  
58  
59  
60

1  
2  
3 of exposure (Step 1 communities) versus a maximum two years of exposure (Step 2  
4 communities) rather than comparing against a current practice control. However, BMI  
5 change data is being collected from a small number of schools in 13 communities external to  
6 the WHO STOPS study.[52] The methods of data collection and general characteristics of  
7 the surveyed schools differ from the current study. While these external communities do not  
8 constitute the ideal control group, several of the external communities are comparable (in  
9 terms of population and geographic proximity to major urban centres). The external  
10 communities will provide an indication of BMI trends in non WHO STOPS settings. This will  
11 facilitate the estimation of plausible variations in treatment effects at 2 and 4 years for use in  
12 sensitivity analyses.  
13  
14  
15  
16  
17  
18

19 It is possible that other family members of targeted children and the broader community may  
20 also benefit from the WHO STOPS intervention in terms of BMI change.[35] Furthermore,  
21 the intervention may result in (a) productivity gains given potentially reduced child  
22 absenteeism from school for obesity-related reasons leading to lower parent absenteeism  
23 from work, and (b) improved future income levels arising from improved schooling  
24 outcomes.[53, 54] Best available evidence on such broader potential costs and benefits will  
25 be sought and included in scenario analyses.  
26  
27  
28  
29  
30

31 Given uncertainty around the maintenance of community responses and treatment effects  
32 beyond the trial period, modelling of future benefits and health cost savings will test a range  
33 of plausible assumptions of decayed and maintained treatment effect. These may range  
34 from full decay over 5 or 10 years through to 100% maintenance of effect. In the event that  
35 within trial analyses of the proxy indicators of system change suggest an accentuation of  
36 treatment effect is plausible, modest accentuation of treatment effect will also be modelled.  
37  
38  
39  
40

41 Extensive analyses will be undertaken to test the sensitivity of results to plausible variations  
42 in all trial-based and modelled variables, including assumptions around the maintenance of  
43 any observed changes in BMI (as discussed above), PA and fruit and vegetable  
44 consumption as well the costs of alternative approaches to GMB facilitation (where local  
45 community members are trained to facilitate). Further, in the event that BMI changes are  
46 observed in children, the potential impact on the intervention's cost-effectiveness of broader  
47 "family effects" will be investigated in scenario analyses. The potential for system dynamics  
48 models to estimate the impact of "system-wide" changes on future obesity-related  
49 behaviours and prevalence will be explored and considered for use in scenario analyses.  
50  
51  
52  
53  
54  
55  
56  
57  
58  
59  
60

## 5. Conclusion

Obesity is associated with poorer health and quality of life - its prevalence is high and rising in many countries.[55] Childhood obesity can have detrimental health and wellbeing implications during childhood and is a major predictor of obesity in adulthood and its serious and expensive associated conditions.[5] Community-based strategies have been effective in achieving some reductions in population BMI, but these have not been sustained. The WHO STOPS intervention builds on this evidence base. It seeks to harness existing community resources and expand the extent of local engagement in obesity-risk reduction, across whole communities.

Evaluating the cost-effectiveness of this novel systems-based intervention will help policy-makers by assessing the resource use implications of achieving any observed intervention effect. This protocol considers the main challenges posed by the economic evaluation of such a complex intervention designed to produce systems change. This protocol registers our intent to conduct this evaluation alongside the WHO STOPS Childhood Obesity Trial, and describes for transparency, the predetermined approaches for addressing the methodological challenges described and the analyses planned *a priori*. This does not preclude additional hurdles arising during the course of the project forcing additions to or deviations from this plan, but these will be openly documented during the reporting of results.

## 6. References

1. Williams EP, Mesidor M, Winters K, et al. Overweight and Obesity: Prevalence, Consequences, and Causes of a Growing Public Health Problem. *Curr Obes Rep* 2015;4(3):363-70. doi: 10.1007/s13679-015-0169-4 [published Online First: 2015/12/03]
2. Han JC, Lawlor DA, Kimm SY. Childhood obesity. *Lancet* 2010;375(9727):1737-48. doi: 10.1016/s0140-6736(10)60171-7 [published Online First: 2010/05/11]
3. Pulgarón ER. Childhood Obesity: A Review of Increased Risk for Physical and Psychological Comorbidities. *Clinical Therapeutics* 2013;35(1):A18-A32. doi: <https://doi.org/10.1016/j.clinthera.2012.12.014>
4. Singh AS, Mulder C, Twisk JW, et al. Tracking of childhood overweight into adulthood: a systematic review of the literature. *Obes Rev* 2008;9(5):474-88. doi: 10.1111/j.1467-789X.2008.00475.x [published Online First: 2008/03/12]
5. Llewellyn A, Simmonds M, Owen CG, et al. Childhood obesity as a predictor of morbidity in adulthood: a systematic review and meta-analysis. *Obes Rev* 2016;17(1):56-67. doi: 10.1111/obr.12316 [published Online First: 2015/10/07]
6. Ng M, Fleming T, Robinson M, et al. Global, regional and national prevalence of overweight and obesity in children and adults 1980-2013: A systematic analysis. *Lancet (London, England)* 2014;384(9945):766-81. doi: 10.1016/S0140-6736(14)60460-8
7. Australian Bureau of Statistics. National Health Survey: First Results, 2014-15. . Canberra, Australia: Australian Bureau of Statistics, Commonwealth of Australia., 2016.
8. Duckett S, H S, T W. A sugary drinks tax: recovering the community costs of obesity. Melbourne, Australia: Grattan Institute, 2016
9. Wake M, Baur LA, Gerner B, et al. Outcomes and costs of primary care surveillance and intervention for overweight or obese children: the LEAP 2 randomised controlled trial *BMJ* 2009;339:b3308
10. Pan L, Sherry B, Park S, et al. The Association of Obesity and School Absenteeism Attributed to Illness or Injury Among Adolescents in the United States, 2009. *Journal of Adolescent Health* 2013;52(1):64-69. doi: <http://dx.doi.org/10.1016/j.jadohealth.2012.04.003>
11. Hayes A, Chevalier A, D'Souza M, et al. Early childhood obesity: Association with healthcare expenditure in Australia. *Obesity* 2016;24(8):1752-58. doi: 10.1002/oby.21544
12. Colagiuri S, Lee CM, Colagiuri R, et al. The cost of overweight and obesity in Australia. *The Medical journal of Australia* 2010;192(5):260-4. [published Online First: 2010/03/06]
13. Waters E, de Silva-Sanigorski A, Hall B, et al. Interventions for preventing obesity in children. . *Cochrane Database of Systematic Reviews* 2011; Issue 12. Art. No.: CD001871. DOI: 10.1002/14651858.CD001871.pub3
14. Luckner H, Moss JR, Gericke CA. Effectiveness of interventions to promote healthy weight in general populations of children and adults: a meta-analysis. *European journal of public health* 2012;22(4):491-7. doi: 10.1093/eurpub/ckr141 [published Online First: 2011/10/05]
15. Treadwell JR, Sun F, Schoelles K. Systematic Review and Meta-Analysis of Bariatric Surgery for Pediatric Obesity. *Annals of Surgery* 2008;248(5):763-76. doi: 10.1097/SLA.0b013e31818702f4
16. Swinburn BA, Sacks G, Hall KD, et al. The global obesity pandemic: shaped by global drivers and local environments. *Lancet* 2011;378(9793):804-14. doi: 10.1016/s0140-6736(11)60813-1 [published Online First: 2011/08/30]
17. Shaya FT, Flores D, Gbarayor CM, et al. School-based obesity interventions: A literature review. *J Sch Health* 2008;78(4):189-96. doi: 10.1111/j.1746-1561.2008.00285.x

18. Wilkie HJ, Standage M, Gillison FB, et al. Multiple lifestyle behaviours and overweight and obesity among children aged 9–11 years: results from the UK site of the International Study of Childhood Obesity, Lifestyle and the Environment. *BMJ Open* 2016;6(2) doi: 10.1136/bmjopen-2015-010677
19. Allender S, Millar L, Hovmand P, et al. Whole of Systems Trial of Prevention Strategies for Childhood Obesity: WHO STOPS Childhood Obesity. *International journal of environmental research and public health* 2016;13(11) doi: 10.3390/ijerph13111143 [published Online First: 2016/11/18]
20. Sterman JD. *Business dynamics: Systems thinking and modeling for a complex world*. Boston: Irwin McGraw-Hill 2000.
21. Hovmand PS. *Group Model Building and Community-Based System Dynamics Process*. Community Based System Dynamics. New York, NY: Springer New York 2014:17-30.
22. Kania J, Kramer M. Collective impact. *Stanford Social Innovation Review* 2011;9( 1):36-41.
23. Oortwijn W, Mathijssen J, Banta D. The role of health technology assessment on pharmaceutical reimbursement in selected middle-income countries. *Health Policy* 2010;95(2):174-84. doi: <http://dx.doi.org/10.1016/j.healthpol.2009.12.008>
24. Stafinski T, Menon D, Philippon DJ, et al. Health Technology Funding Decision-Making Processes Around the World. *PharmacoEconomics* 2011;29(6):475-95. doi: 10.2165/11586420-000000000-00000
25. Malakellis M, Hoare E, Sanigorski A, et al. School-based systems change for obesity prevention in adolescents: outcomes of the Australian Capital Territory 'It's Your Move!'. *Australian and New Zealand Journal of Public Health* 2017:n/a-n/a. doi: 10.1111/1753-6405.12696
26. Husereau D, Drummond M, Petrou S, et al. Consolidated Health Economic Evaluation Reporting Standards (CHEERS) statement. *BMJ : British Medical Journal* 2013;346 doi: 10.1136/bmj.f1049
27. Drummond MF, Stoddart GL, Torrance GW. *Methods for the Economic Evaluation of Health Care Programmes*. Oxford: Oxford University Press 2005.
28. McAuley KA, Taylor RW, Farmer VL, et al. Economic evaluation of a community-based obesity prevention program in children: the APPLE project. *Obesity (Silver Spring, Md)* 2010;18(1):131-36. doi: 10.1038/oby.2009.148
29. Haby MM, Vos T, Carter R, et al. A new approach to assessing the health benefit from obesity interventions in children and adolescents: the assessing cost-effectiveness in obesity project. *Int J Obes* 2006;30(10):1463-75.
30. Moodie ML, Herbert JK, de Silva-Sanigorski AM, et al. The cost-effectiveness of a successful community-based obesity prevention program: The be active eat well program. *Obesity* 2013;21(10):2072-80. doi: 10.1002/oby.20472
31. Vennix JA. *Group model building: Facilitating team learning using system dynamics* Chichester: Wiley 1996.
32. Allender S, Owen B, Kuhlberg J, et al. A Community Based Systems Diagram of Obesity Causes. *PLOS ONE* 2015;10(7):e0129683. doi: 10.1371/journal.pone.0129683
33. Crooks N, Strugnell C, Bell C, et al. Establishing a sustainable childhood obesity monitoring system in regional Victoria. *Health promotion journal of Australia : official journal of Australian Association of Health Promotion Professionals* 2016 doi: 10.1071/he16020 [published Online First: 2016/12/22]
34. Gubbels JS, Mathisen FK, Samdal O, et al. The assessment of ongoing community-based interventions to prevent obesity: lessons learned. *BMC Public Health* 2015;15(1):216. doi: 10.1186/s12889-015-1563-2
35. Frew E. Economic Evaluation of Childhood Obesity Interventions: Reflections and Suggestions. *PharmacoEconomics* 2016;34(8):733-40. doi: 10.1007/s40273-016-0398-8
36. Johnson K, Collins D, Shamblen S, et al. Long-Term Sustainability of Evidence-Based Prevention Interventions and Community Coalitions Survival: a Five and One-Half

- Year Follow-up Study. *Prevention Science* 2017;18(5):610-21. doi: 10.1007/s11121-017-0784-2
37. Sterman JD. Learning from Evidence in a Complex World. *American Journal of Public Health* 2006;96(3):505-14. doi: 10.2105/AJPH.2005.066043
38. Shiell A, Hawe P, Gold L. Complex interventions or complex systems? Implications for health economic evaluation. *BMJ : British Medical Journal* 2008;336(7656):1281-83. doi: 10.1136/bmj.39569.510521.AD
39. Hawe P, Shiell A, Riley T, et al. Methods for exploring implementation variation and local context within a cluster randomised community intervention trial. *Journal of Epidemiology and Community Health* 2004;58(9):788-93. doi: 10.1136/jech.2003.014415
40. Weatherly H, Drummond M, Claxton K, et al. Methods for assessing the cost-effectiveness of public health interventions: key challenges and recommendations. *Health Policy* 2009;93 doi: 10.1016/j.healthpol.2009.07.012
41. Tudor Edwards R, Charles JM, Lloyd-Williams H. Public health economics: a systematic review of guidance for the economic evaluation of public health interventions and discussion of key methodological issues. *BMC Public Health* 2013;13(1):1001. doi: 10.1186/1471-2458-13-1001
42. Husereau D, Jacobs P, Manns B, et al. Economic evaluation of complex health system interventions: a discussion paper. Edmonton Alberta, Canada: Institute of Health Economics, 2014.
43. Lung TW, Muhunthan J, Laba T-L, et al. Making guidelines for economic evaluations relevant to public health in Australia. *Australian and New Zealand Journal of Public Health* 2017;41(2):115-17. doi: 10.1111/1753-6405.12601
44. Commonwealth of Australia. Guidelines for preparing submissions to the Pharmaceutical Benefits Advisory Committee (Version 5.0). Canberra, 2016.
45. Carter R, Moodie M, Markwick A, et al. Assessing Cost-Effectiveness in Obesity (ACE-Obesity): an overview of the ACE approach, economic methods and cost results. *BMC Public Health* 2009;9(1):419. doi: 10.1186/1471-2458-9-419
46. Varni JW, Seid M, Kurtin PS. PedsQL 4.0: reliability and validity of the Pediatric Quality of Life Inventory version 4.0 generic core scales in healthy and patient populations. *Med Care* 2001;39(8):800-12. [published Online First: 2001/07/27]
47. Wailoo AJ, Hernandez-Alava M, Manca A, et al. Mapping to Estimate Health-State Utility from Non-Preference-Based Outcome Measures: An ISPOR Good Practices for Outcomes Research Task Force Report. *Value Health* 2017;20(1):18-27. doi: 10.1016/j.jval.2016.11.006 [published Online First: 2017/02/19]
48. Stevens K. Valuation of the Child Health Utility 9D Index. *Pharmacoeconomics* 2012;30(8):729-47. doi: 10.2165/11599120-000000000-00000 [published Online First: 2012/07/14]
49. Valente TW, Palinkas LA, Czaja S, et al. Social Network Analysis for Program Implementation. *PLOS ONE* 2015;10(6):e0131712. doi: 10.1371/journal.pone.0131712
50. Plested B, Edwards R, Jumper-Thurman P. Community Readiness: A handbook for successful change. Colorado: CO: Tri-Ethnic Center for Prevention Research. 2006.
51. Brown V, Moodie M, Cobiac L, et al. Obesity-related health impacts of fuel excise taxation- an evidence review and cost-effectiveness study. *BMC Public Health* 2017;17(1):359. doi: 10.1186/s12889-017-4271-2
52. Strugnell C, Millar L, Churchill A, et al. Healthy together Victoria and childhood obesity— a methodology for measuring changes in childhood obesity in response to a community-based, whole of system cluster randomized control trial. *Archives of Public Health* 2016;74:16. doi: 10.1186/s13690-016-0127-y
53. Black N, Johnston DW, Peeters A. Childhood Obesity and Cognitive Achievement. *Health Economics* 2015;24(9):1082-100. doi: 10.1002/hec.3211

- 1  
2  
3 54. Cawley J. The economics of childhood obesity. *Health affairs (Project Hope)*  
4 2010;29(3):364-71. doi: 10.1377/hlthaff.2009.0721 [published Online First:  
5 2010/03/03]  
6 55. Hruby A, Hu FB. The Epidemiology of Obesity: A Big Picture. *PharmacoEconomics*  
7 2015;33(7):673-89. doi: 10.1007/s40273-014-0243-x  
8  
9  
10  
11  
12  
13  
14  
15  
16  
17  
18  
19  
20  
21  
22  
23  
24  
25  
26  
27  
28  
29  
30  
31  
32  
33  
34  
35  
36  
37  
38  
39  
40  
41  
42  
43  
44  
45  
46  
47  
48  
49  
50  
51  
52  
53  
54  
55  
56  
57  
58  
59  
60

For peer review only



1  
2  
3  
4  
5  
6  
7  
8  
9  
10  
11  
12  
13  
14  
15  
16  
17  
18  
19  
20  
21  
22  
23  
24  
25  
26  
27  
28  
29  
30  
31  
32  
33  
34  
35  
36  
37  
38  
39  
40  
41  
42  
43  
44  
45  
46  
47  
48  
49  
50  
51  
52  
53  
54  
55  
56  
57  
58  
59  
60

FIGURE 1. Sample of a causal loop diagram - LEGEND

Source: Allender, S, Owen, B, Kuhlberg, J, Lowe, J, Nagorcka-Smith, P, Whelan, J & Bell, C 2015, 'A Community Based Systems Diagram of Obesity Causes', PLOS ONE, vol. 10, no. 7, p. e0129683 (approved for use under the Creative Commons open access license - CC BY).

For peer review only
